# Supplementary material for: A generalist–specialist trade-off between switchgrass cytotypes impacts climate adaptation and geographic range
Source: PubMed Central journal article supplement — Proc Natl Acad Sci U S A. 2022 Apr 4;119(15):e2118879119. doi: 10.1073/pnas.2118879119 (PMC9169841; doi:10.1073/pnas.2118879119), 2022-04-04
Supplement: pnas.2118879119.sapp.pdf [file pnas.2118879119.sapp.pdf]

a

### Legend

Sample Ancestry

- Atlantic
- Gulf
- Midwest
- Atlantic > Gulf
- Gulf > Atlantic
- Gulf > Midwest
- Midwest > Gulf
- Atlantic + Gulf + Midwest

Ploidy

- 4X
- 6X
- 8X

Clade Majority Ancestry

- Atlantic
- Gulf
- Midwest

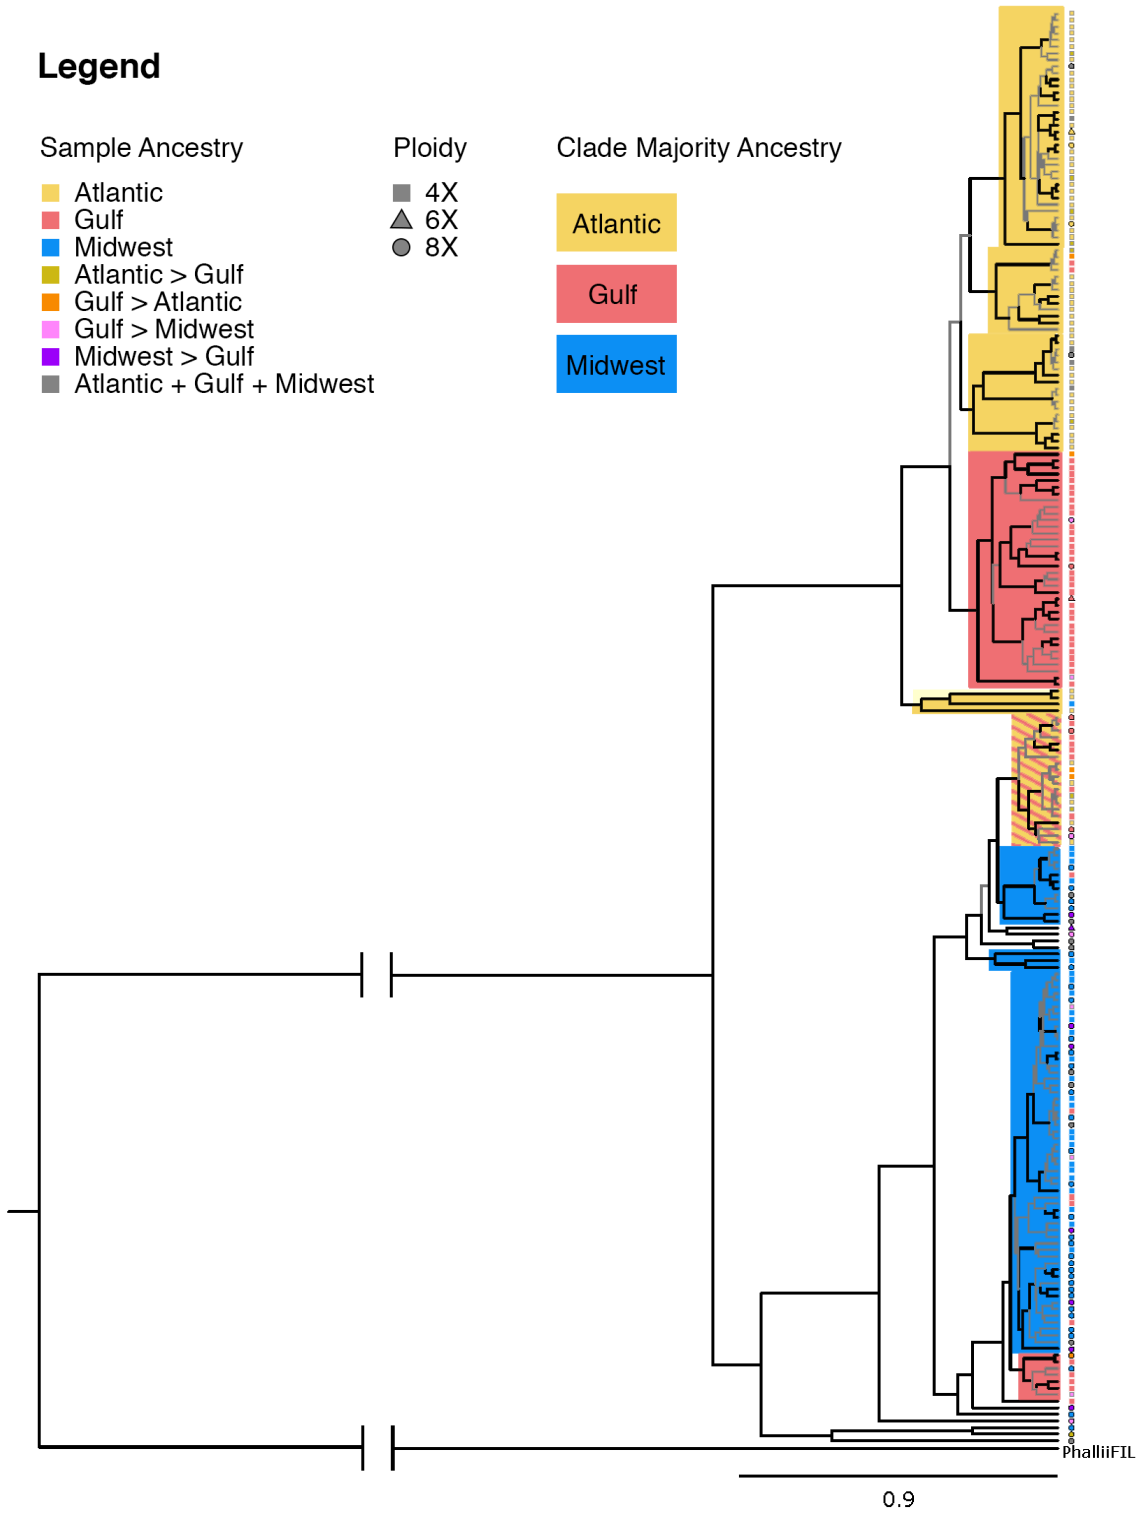

**Supplemental Figure 1.** Enlarged version of figure 2a with individual points that indicate the nuclear ancestry and ploidy of each sample. Gray branches indicate less than .95 posterior

probability support, and black branches indicate greater than .95 posterior probability support. The outgroup is *P. halli* with an estimated divergence date of 8.35 mya.

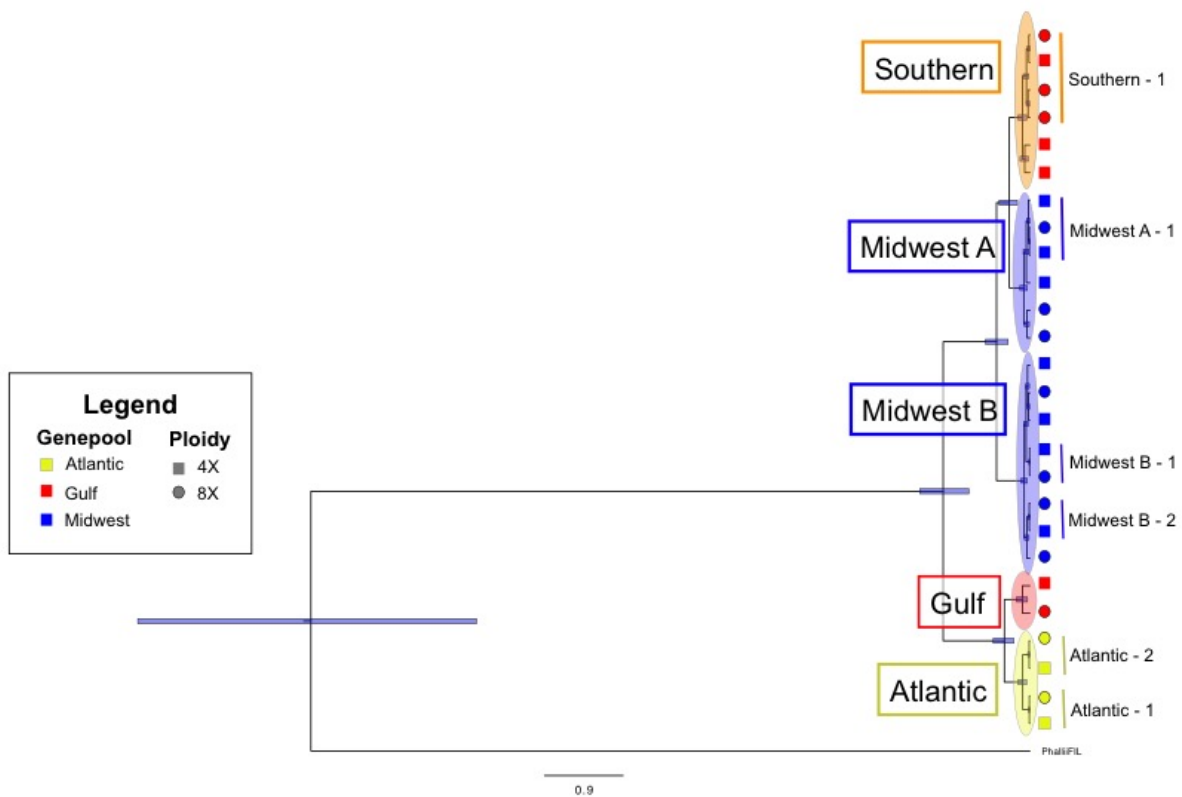

**Supplemental Figure 2.** Chloroplast tree using samples (see Supplemental Table 4) chosen to date the divergence of identified switchgrass groups using BEAST v2.6.6 (see Supplemental Table 2 for divergence date estimates).

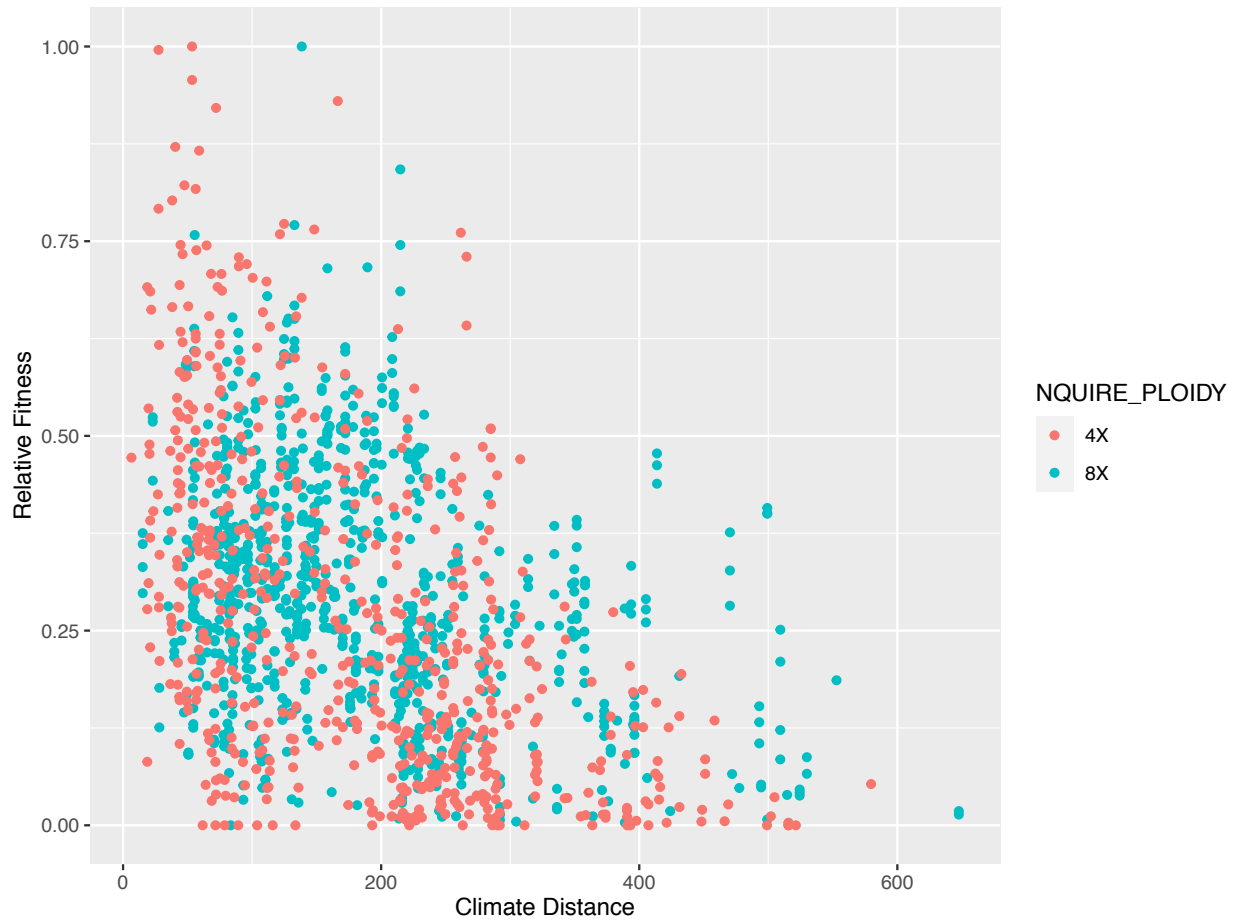

**Supplemental Figure 3.** Individual points used for plotting the linear relationship of relative fitness versus climate distance in Figure 3b.

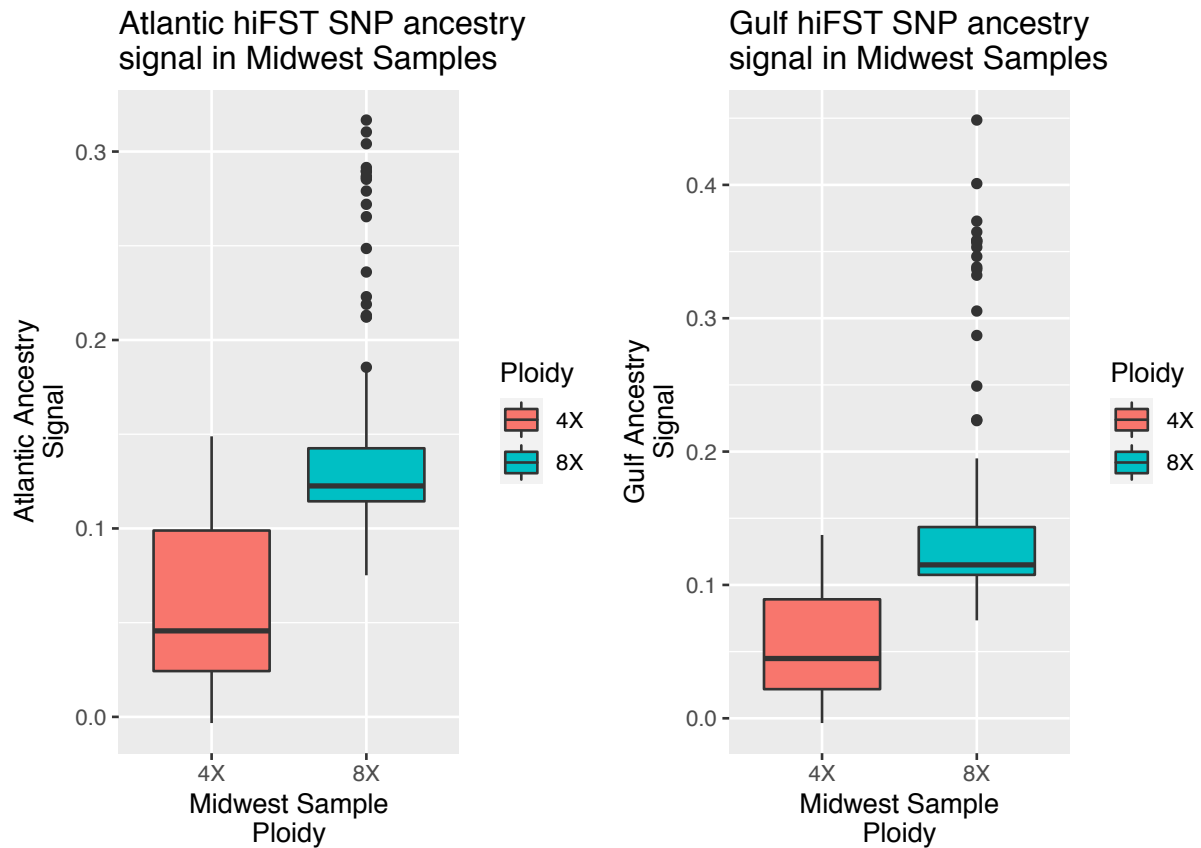

**Supplemental Figure 4.** Southern gene pool ancestry signal in Midwest gene pool. Signal of Atlantic and Gulf ancestry in 63 Midwest 4X and 105 Midwest 8X switchgrass, based on ancestry-informative alleles from SNPs with  $F_{st} > 0.5$  between Atlantic or Gulf and Midwest 4X training sets.

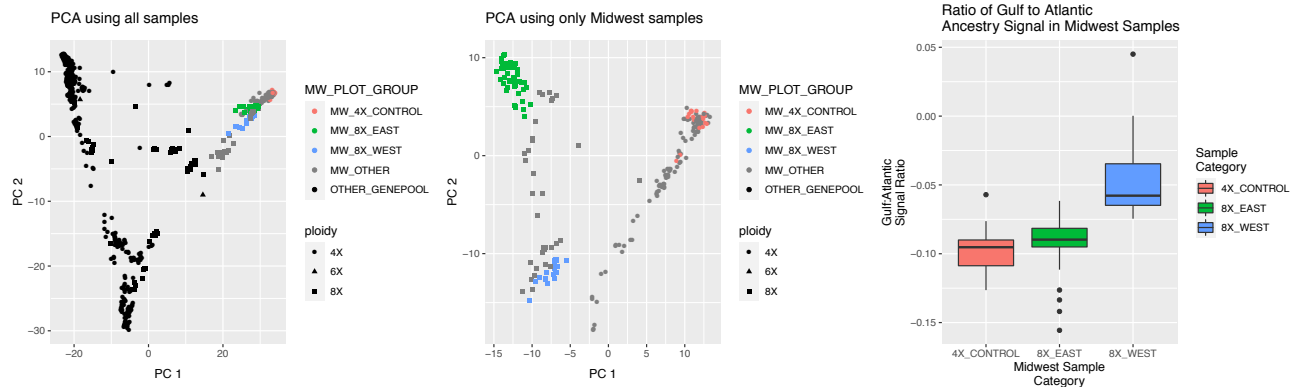

**Supplemental Figure 5.** Comparison of Southern genepool ancestry signal in Midwest 8X. A subset of Midwest 8X samples with similar levels of Southern genepool ancestry signal were assigned to "East" and "West" groups based on PCA differentiation and geographic distribution. Red = Midwest 4X "control" samples with low Southern genepool ancestry signal, N = 20; green = Midwest 8X from eastern US, N = 52; blue = Midwest 8X mainly from western US, N = 20. (first panel) PCA plot of 706 samples in overall analysis; grey = Midwest samples not included in analysis in (third panel), black = Atlantic, Gulf, or Admixed samples. (second panel) PCA plot of Midwest samples; grey = Midwest samples not included in analysis in (third panel). (third panel) Ratio of Gulf to Atlantic ancestry signal. Midwest 4X control samples used to show background pattern; higher value on y-axis indicates higher ratio of Gulf to Atlantic ancestry signals.

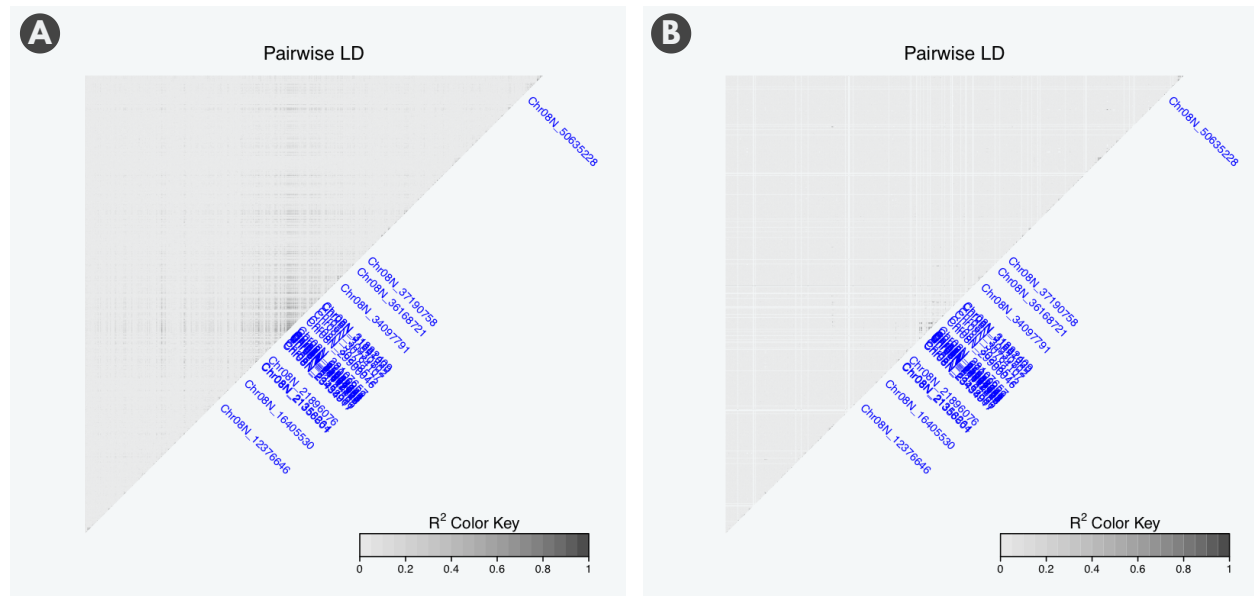

**Supplemental Figure 6.** Linkage disequilibrium (LD) on Chromosome 08N for SNPs used in RDA analysis. Overlapping outlier SNPs are identified with blue text. **A)** Patterns of LD in the Midwest subpopulation. **B)** Patterns of LD in the Atlantic subpopulation.

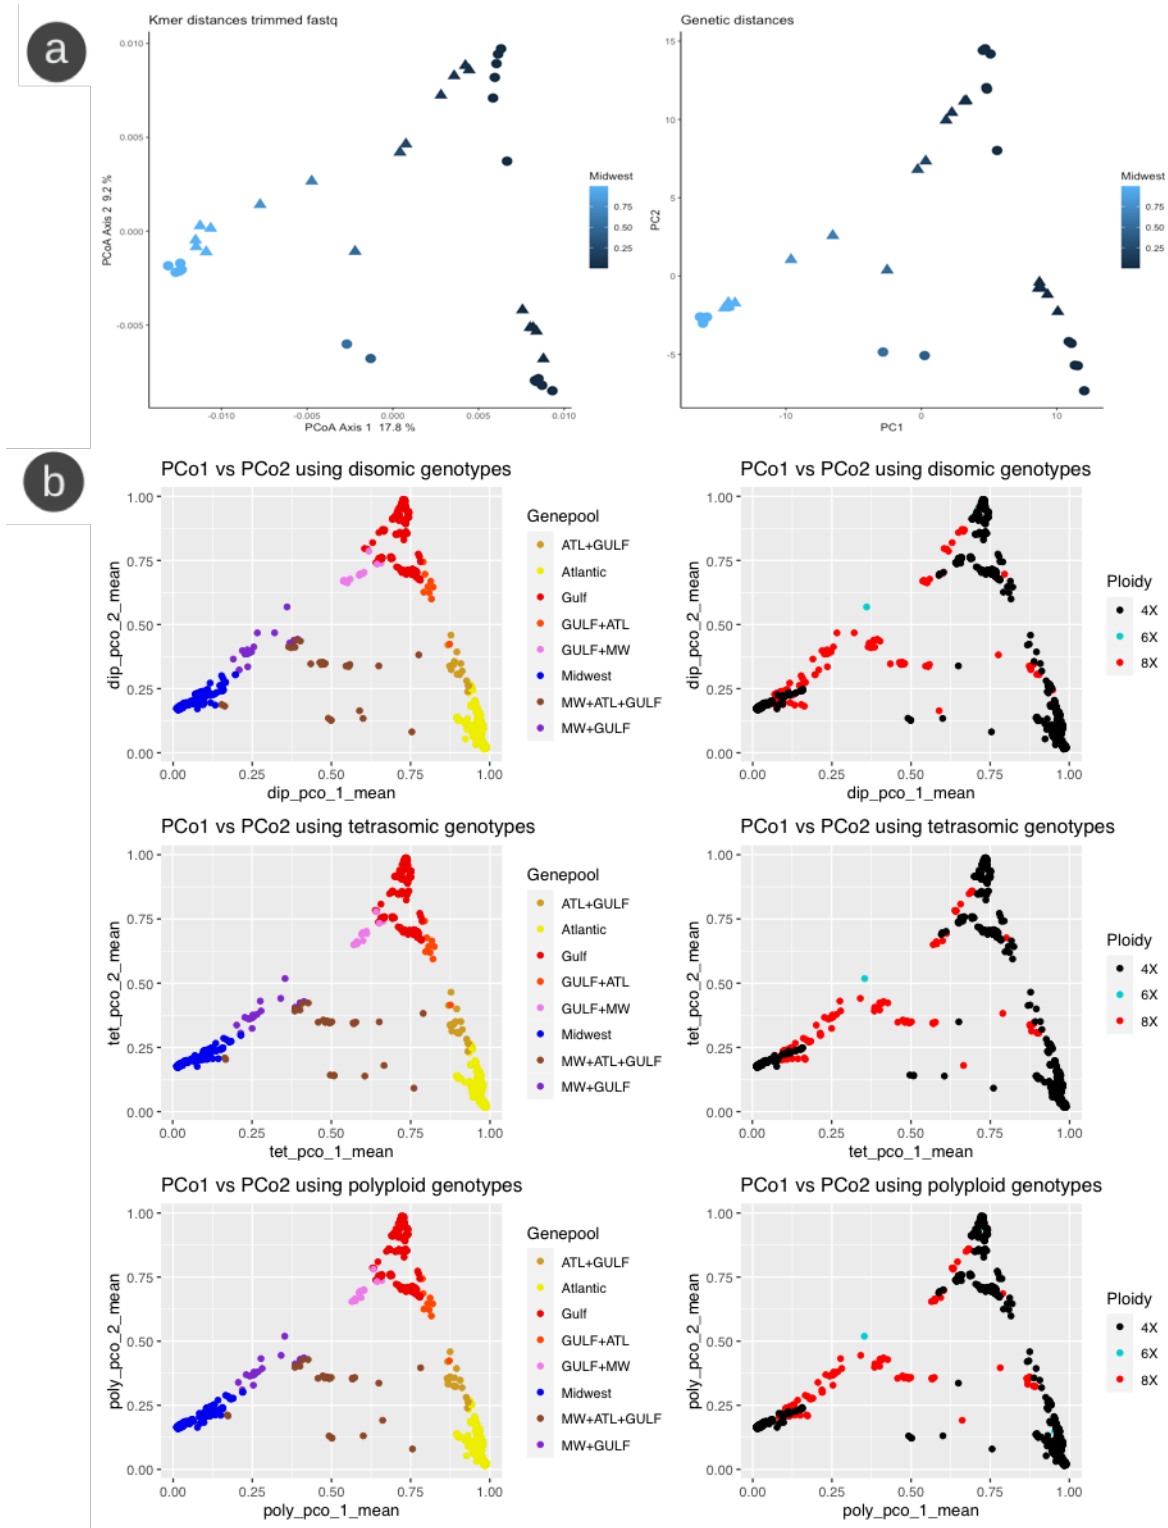

**Supplemental Figure 7.** Population structure results are robust to genotyping methods. **A)** Strong similarity between PCoA generated from reference-free k-mer approach (left) and PCA generated using genotypes used in full analysis (right) shows that population structure patterns are not substantially biased by ploidy differences. Shape indicates ploidy (circle = 4X, triangle =



8X) and color indicates proportion of Midwest ancestry. The k-mer approach is computationally intensive, so the comparison uses a subset of 36 samples. B) Comparisons of PCoA results using different genotyping models for the same 50k SNPs. Top row uses disomic genotypes where all samples are assigned diploid (RR) genotypes. Second row uses tetrasomic genotypes where all samples are assigned tetraploid (RRRR) genotypes. Third row uses polyploid genotypes where 4X samples are assigned diploid genotypes and 8X individuals are assigned tetraploid genotypes. Left column shows samples colored by ancestry, right column shows samples colored by ploidy. Patterns are similar when using all three genotyping models.

| PLANT_ID | LIB  | Ploidy | Lat     | Long         | Approx_genome_coverage_mapped | Properly_paired_reads | SRA         |
|----------|------|--------|---------|--------------|-------------------------------|-----------------------|-------------|
| J685.C   | ITCS | 4x     | 39.2594 | -75.46198056 | 37.98483847                   | 286116487             | SRR11611480 |
| J685.B   | ITCR | 4x     | 39.2594 | -75.46198056 | 31.82959383                   | 239752805             | SRR11611481 |
| J685.A   | ITCQ | 4x     | 39.2594 | -75.46198056 | 32.0253387                    | 241227231             | SRR11611482 |
| J684.A   | ITCN | 4x     | 38.5639 | -75.0728     | 24.99251629                   | 188253294             | SRR11611484 |
| J683.E   | ITCM | 4x     | 39.3375 | -75.07456944 | 18.48334479                   | 139223698             | SRR11611485 |
| J683.D   | ITCL | 4x     | 39.3375 | -75.07456944 | 37.80870027                   | 284789746             | SRR11611486 |
| J683.C   | ITCK | 4x     | 39.3375 | -75.07456944 | 33.43415328                   | 251838967             | SRR11611487 |
| J683.A   | ITCJ | 4x     | 39.3375 | -75.07456944 | 37.52312982                   | 282638719             | SRR11611488 |
| J682.B   | ITCH | 4x     | 40.1789 | -74.31703889 | 32.32889282                   | 243513718             | SRR11611490 |
| J682.A   | ITCG | 4x     | 40.1789 | -74.31703889 | 34.24389929                   | 257938287             | SRR11611491 |
| J680.C   | ITCF | 4x     | 35.5696 | -76.510591   | 37.90925684                   | 285547177             | SRR11611492 |
| J680.A   | ITCE | 4x     | 35.5696 | -76.510591   | 37.82594075                   | 284919608             | SRR11611493 |
| J679.C   | ITCD | 4x     | 35.4443 | -76.363746   | 38.14543046                   | 287326128             | SRR11611494 |
| J679.B   | ITCC | 4x     | 35.4443 | -76.363746   | 38.10328977                   | 287008708             | SRR11611495 |
| J679.A   | ITCB | 4x     | 35.4443 | -76.363746   | 37.51152911                   | 282551338             | SRR11611496 |
| J678.C   | ITCA | 4x     | 35.5785 | -75.927189   | 27.12818337                   | 204339964             | SRR11611497 |
| J678.A   | ITBZ | 4x     | 35.5785 | -75.927189   | 38.42216812                   | 289410623             | SRR11611498 |
| J677.C   | ITBY | 4x     | 35.9057 | -76.031982   | 31.33102715                   | 235997408             | SRR11611499 |
| J677.B   | ITBX | 4x     | 35.9057 | -76.031982   | 37.85460139                   | 285135491             | SRR11611500 |
| J677.A   | ITBW | 4x     | 35.9057 | -76.031982   | 38.19927688                   | 287731720             | SRR11611501 |
| J676.C   | ITBU | 4x     | 37.7686 | -76.347208   | 38.18578447                   | 287630090             | SRR11611502 |
| J676.B   | ITBT | 4x     | 37.7686 | -76.347208   | 29.27909555                   | 220541466             | SRR11611503 |
| J676.A   | ITBS | 4x     | 37.7686 | -76.347208   | 38.34300662                   | 288814348             | SRR11611504 |
| J675.C   | ITBR | 4x     | 37.781  | -76.307789   | 37.72513193                   | 284160277             | SRR11611505 |
| J674.C   | ITBQ | 4x     | 39.5659 | -75.7295     | 28.61256019                   | 215520864             | SRR11611506 |
| J674.B   | ITBP | 4x     | 39.5659 | -75.7295     | 29.81405375                   | 224570978             | SRR11611507 |
| J674.A   | ITBN | 4x     | 39.5659 | -75.7295     | 30.35095769                   | 228615146             | SRR11611508 |
| J673.D   | ITBM | 4x     | 38.8202 | -75.22818889 | 36.87492026                   | 277756154             | SRR11611509 |
| J673.C   | ITBL | 4x     | 38.8202 | -75.22818889 | 36.5291199                    | 275151452             | SRR11611510 |
| J673.B   | ITBK | 4x     | 38.8202 | -75.22818889 | 24.84487358                   | 187141192             | SRR11611511 |
| J673.A   | ITBJ | 4x     | 38.8202 | -75.22818889 | 37.73533202                   | 284237108             | SRR11611512 |
| J464.A   | ITAU | 4x     | 29.7159 | -94.63221    | 38.79439742                   | 292214398             | SRR11611513 |
| J672.B   | IRYZ | 4x     | 39.2546 | -75.46608056 | 37.76209034                   | 284438662             | SRR11611515 |
| J672.A   | IRYY | 4x     | 39.2546 | -75.46608056 | 39.12432021                   | 294699504             | SRR11611516 |
| J671.C   | IRYX | 4x     | 38.9643 | -76.209929   | 37.99078227                   | 286161258             | SRR11611517 |
| J671.B   | IRYW | 4x     | 38.9643 | -76.209929   | 38.48587714                   | 289890504             | SRR11611518 |
| J671.A   | IRYU | 4x     | 38.9643 | -76.209929   | 38.79203496                   | 292196603             | SRR11611519 |
| J670.C   | IRYT | 4x     | 39.5519 | -74.34115    | 37.59027481                   | 283144481             | SRR11611520 |
| J670.B   | IRYS | 4x     | 39.5519 | -74.34115    | 38.49937605                   | 289992183             | SRR11611521 |
| J670.A   | IRYR | 4x     | 39.5519 | -74.34115    | 30.21849144                   | 227617359             | SRR11611522 |
| J669.C   | IRYQ | 4x     | 40.5966 | -74.18222222 | 37.8047261                    | 284759811             | SRR11611523 |
| J669.B   | IRYP | 4x     | 40.5966 | -74.18222222 | 38.69732261                   | 291483193             | SRR11611524 |
| J669.A   | IRYN | 4x     | 40.5966 | -74.18222222 | 38.91775899                   | 293143605             | SRR11611525 |
| J667.B   | IRYL | 4x     | 35.0296 | -79.610713   | 38.18096741                   | 287593806             | SRR11611526 |
| J667.A   | IRYK | 4x     | 35.0296 | -79.610713   | 38.27601285                   | 288309725             | SRR11611527 |
| J667.C   | IRYJ | 4x     | 35.0296 | -79.610713   | 37.55466046                   | 282876220             | SRR11611528 |
| J666.C   | IRYI | 4x     | 35.611  | -75.923248   | 38.34402768                   | 288822039             | SRR11611529 |
| J666.B   | IRYH | 4x     | 35.611  | -75.923248   | 38.34329591                   | 288816527             | SRR11611530 |
| J666.A   | IRYG | 4x     | 35.611  | -75.923248   | 38.68056471                   | 291356966             | SRR11611531 |
| J665.H   | IRYF | 4x     | 40.9421 | -73.47866667 | 38.59629646                   | 290722225             | SRR11611532 |
| J665.G   | IRYE | 4x     | 40.9421 | -73.47866667 | 37.98575637                   | 286123401             | SRR11611533 |
| J665.F   | IRYD | 4x     | 40.9421 | -73.47866667 | 38.81309813                   | 292355259             | SRR11611534 |
| J665.E   | IRYC | 4x     | 40.9421 | -73.47866667 | 38.25199191                   | 288128790             | SRR11611535 |
| J665.C   | IRYB | 4x     | 40.9421 | -73.47866667 | 38.42680317                   | 289445536             | SRR11611536 |
| J665.B   | IRYA | 4x     | 40.9421 | -73.47866667 | 37.78843551                   | 284637104             | SRR11611537 |
| J665.A   | IRXX | 4x     | 40.9421 | -73.47866667 | 38.47950665                   | 289842519             | SRR11611538 |
| J665.D   | IRXY | 4x     | 40.9421 | -73.47866667 | 38.37249117                   | 289036437             | SRR11611539 |
| J664.E   | IRXX | 4x     | 39.7735 | -74.53361111 | 36.9998861                    | 278697445             | SRR11611540 |
| J664.G   | IRXW | 4x     | 39.7735 | -74.53361111 | 35.47920379                   | 267243078             | SRR11611541 |
| J664.D   | IRXU | 4x     | 39.7735 | -74.53361111 | 37.98984206                   | 286154176             | SRR11611542 |
| J664.C   | IRXT | 4x     | 39.7735 | -74.53361111 | 38.1350546                    | 287247973             | SRR11611543 |
| J664.B   | IRXS | 4x     | 39.7735 | -74.53361111 | 33.7965286                    | 254568518             | SRR11611544 |
| J664.A   | IRXR | 4x     | 39.7735 | -74.53361111 | 26.0583117                    | 196281277             | SRR11611545 |
| J664.F   | IRXQ | 4x     | 39.7735 | -74.53361111 | 38.06493473                   | 286719803             | SRR11611546 |
| J663.C   | IRXP | 4x     | 38.3737 | -76.149184   | 38.46352633                   | 289722149             | SRR11611547 |
| J663.B   | IRXM | 4x     | 38.3737 | -76.149184   | 16.18552977                   | 121915667             | SRR11611548 |
| J663.A   | IRXN | 4x     | 38.3737 | -76.149184   | 38.42885219                   | 289460970             | SRR11611549 |
| J662.C   | IRXL | 4x     | 37.7491 | -75.785507   | 29.79245356                   | 224408277             | SRR11611550 |
| J662.B   | IRXK | 4x     | 37.7491 | -75.785507   | 32.91868571                   | 247956266             | SRR11611551 |
| J662.A   | IRXJ | 4x     | 37.7491 | -75.785507   | 38.20322264                   | 287761441             | SRR11611552 |
| J662.F   | IRXI | 4x     | 37.7491 | -75.785507   | 38.6266474                    | 290950840             | SRR11611553 |
| J661.B   | IRXE | 4x     | 37.8414 | -75.654336   | 35.71149404                   | 268992778             | SRR11611557 |
| J661.A   | IRXD | 4x     | 37.8414 | -75.654336   | 38.13776211                   | 287268367             | SRR11611558 |
| J660.C   | IRXC | 4x     | 29.8979 | -100.996962  | 38.43441776                   | 289502892             | SRR11611559 |
| J660.B   | IRXB | 4x     | 29.8979 | -100.996962  | 41.41585197                   | 311960207             | SRR11611560 |
| J660.A   | IRXA | 4x     | 29.8979 | -100.996962  | 23.12322469                   | 174173067             | SRR11611561 |
| J658.B   | IRWX | 4x     | 38.8854 | -91.54294444 | 37.55706807                   | 282894355             | SRR11611562 |
| J658.A   | IRWV | 4x     | 38.8854 | -91.54294444 | 31.43823965                   | 236804974             | SRR11611563 |
| J657.C   | IRWU | 4x     | 37.073  | -91.19740833 | 37.29245207                   | 280901165             | SRR11611564 |
| J657.B   | IRWT | 4x     | 37.073  | -91.19740833 | 37.6493452                    | 283589422             | SRR11611565 |
| J657.A   | IRWS | 4x     | 37.073  | -91.19740833 | 32.01618888                   | 241158311             | SRR11611566 |

|        |      |    |         |              |             |           |             |
|--------|------|----|---------|--------------|-------------|-----------|-------------|
| J656.C | IRWR | 4x | 37.044  | -91.14075    | 29.39774798 | 221435202 | SRR11611567 |
| J656.B | IRWQ | 4x | 37.044  | -91.14075    | 37.48972142 | 282387074 | SRR11611568 |
| J656.A | IRWP | 4x | 37.044  | -91.14075    | 37.23039338 | 280433715 | SRR11611569 |
| J643.A | IRWK | 4x | 42.9117 | -70.865      | 33.88091686 | 255204163 | SRR11611573 |
| J639.A | IRWJ | 4x | 41.635  | -71.233611   | 38.36407179 | 288973019 | SRR11611574 |
| J638.A | IRWI | 4x | 41.4639 | -71.1925     | 27.11258845 | 204222497 | SRR11611575 |
| J634.A | IRWH | 4x | 43.0379 | -70.71609    | 31.91420168 | 240390104 | SRR11611576 |
| J627.A | IRWG | 4x | 41.4675 | -71.74008    | 34.17342574 | 257407453 | SRR11611577 |
| J602.C | IRWD | 4x | 33.3519 | -79.1937     | 38.17050007 | 287514962 | SRR11611580 |
| J596.B | IRWC | 4x | 38.9524 | -76.23372222 | 38.67498095 | 291314907 | SRR11611581 |
| J592.C | IRWB | 4x | 40.7698 | -72.89763889 | 38.10920755 | 287053283 | SRR11611582 |
| J587.B | IRWA | 4x | 34.0862 | -81.11703    | 40.27958739 | 303401423 | SRR11611583 |
| J584.C | IRUZ | 4x | 32.3436 | -80.45525    | 38.80001171 | 292256687 | SRR11611584 |
| J580.A | IRUY | 4x | 41.8611 | -88.2540556  | 38.39356775 | 289195194 | SRR11611585 |
| J574.C | IRUW | 4x | 40.9817 | -72.616528   | 29.3218788  | 220863726 | SRR11611586 |
| J541.C | IRUU | 4x | 41.0157 | -72.020153   | 32.15533627 | 242206423 | SRR11611587 |
| J515.A | IRUT | 4x | 42.6767 | -70.75944444 | 28.5794027  | 215271109 | SRR11611588 |
| J504.B | IRUS | 4x | 31.1699 | -89.7297778  | 27.0247378  | 203560772 | SRR11611589 |
| J501.C | IRUR | 4x | 30.3871 | -89.4609167  | 27.13172846 | 204366667 | SRR11611590 |
| J433.A | IRUQ | 4x | 41.02   | -72.01       | 32.44211431 | 244366546 | SRR11611591 |
| J420.A | IRUP | 4x | 43      | -86          | 37.52349133 | 282641442 | SRR11611592 |
| J395.B | IRUN | 4x | 42.5755 | -82.576892   | 35.8649235  | 270148468 | SRR11611593 |
| J368.C | IRUM | 4x | 42.5278 | -85.921825   | 37.50154105 | 282476104 | SRR11611594 |
| J368.B | IRUL | 4x | 42.5278 | -85.921825   | 36.34342125 | 273752698 | SRR11611595 |
| J368.A | IRUK | 4x | 42.5278 | -85.921825   | 25.75696392 | 194011409 | SRR11611596 |
| J245.A | IRUI | 4x | 32.86   | -98.42       | 40.63484585 | 306077367 | SRR11611597 |
| J241.A | IRUG | 4x | 30.29   | -99.3969     | 29.28933586 | 220618600 | SRR11611599 |
| J246.A | IRIN | 4x | 32.65   | -98.2603     | 36.0312352  | 271401192 | SRR11611602 |
| J240.A | IRIM | 4x | 28.12   | -97.2342     | 39.4702467  | 297305156 | SRR11611603 |
| J237.A | IRIK | 4x | 28.32   | -99.1231     | 33.36575888 | 251323794 | SRR11611605 |
| J234.A | IRIH | 4x | 30.35   | -97.76       | 40.05659924 | 301721790 | SRR11611608 |
| J231.A | IRIG | 4x | 30.75   | -99.22       | 31.90222553 | 240299895 | SRR11611609 |
| J228.A | IRID | 4x | 28.24   | -96.8092     | 22.85703322 | 172168010 | SRR11611612 |
| J225.A | IRIB | 4x | 30.05   | -99.4499     | 40.62972755 | 306038814 | SRR11611614 |
| J224.A | IRIA | 4x | 28.34   | -99.09       | 37.61171648 | 283305988 | SRR11611615 |
| J220.A | IRIH | 4x | 29.27   | -98.1844     | 29.17588776 | 219764065 | SRR11611617 |
| J219.A | IRHX | 4x | 29.24   | -97.9831     | 25.59220538 | 192770384 | SRR11611618 |
| J215.A | IRHS | 4x | 28.65   | -97.2522     | 29.41640648 | 221575745 | SRR11611621 |
| J210.A | IRHP | 4x | 29.9    | -100.992     | 41.33763413 | 311371040 | SRR11611623 |
| J209.A | IRHN | 4x | 28.11   | -97.0291     | 34.20294481 | 257629802 | SRR11611624 |
| J647.C | INGZ | 4x | 41.4558 | -71.453889   | 38.41212841 | 289935000 | SRR11611635 |
| J647.B | INGY | 4x | 41.4558 | -71.453889   | 30.03183546 | 226211394 | SRR11611636 |
| J646.C | INGX | 4x | 41.4631 | -71.554444   | 24.21826673 | 182421347 | SRR11611637 |
| J646.B | INGW | 4x | 41.4631 | -71.554444   | 30.90346439 | 232776840 | SRR11611638 |
| J646.A | INGU | 4x | 41.4631 | -71.554444   | 38.44308088 | 289568146 | SRR11611639 |
| J645.C | INGT | 4x | 41.4003 | -71.584722   | 23.80171217 | 179283697 | SRR11611640 |
| J645.B | INGS | 4x | 41.4003 | -71.584722   | 20.60163437 | 155179474 | SRR11611641 |
| J645.A | INGR | 4x | 41.4003 | -71.584722   | 30.10414481 | 226756056 | SRR11611642 |
| J644.C | INGQ | 4x | 41.385  | -71.633056   | 37.00404534 | 278728774 | SRR11611643 |
| J644.B | INGP | 4x | 41.385  | -71.633056   | 36.60265781 | 275705368 | SRR11611644 |
| J641.C | INGN | 4x | 41.7386 | -70.737222   | 36.71625567 | 276561031 | SRR11611645 |
| J641.B | INGM | 4x | 41.7386 | -70.737222   | 35.9285615  | 270627814 | SRR11611646 |
| J641.A | INGL | 4x | 41.7386 | -70.737222   | 37.10039249 | 279454498 | SRR11611647 |
| J640.C | INGK | 4x | 41.6789 | -70.774167   | 30.65192246 | 230882129 | SRR11611648 |
| J640.B | INGJ | 4x | 41.6789 | -70.774167   | 37.55844306 | 282904712 | SRR11611649 |
| J635.C | INGF | 4x | 43.5804 | -70.32879    | 27.68180565 | 208510061 | SRR11611652 |
| J635.B | INGE | 4x | 43.5804 | -70.32879    | 34.44499744 | 259453036 | SRR11611653 |
| J635.A | INGD | 4x | 43.5804 | -70.32879    | 36.73397582 | 276694506 | SRR11611654 |
| J626.B | INGB | 4x | 41.3421 | -71.93334    | 28.14735517 | 212016760 | SRR11611655 |
| J625.B | INGA | 4x | 41.3364 | -72.03365    | 37.58646871 | 283115812 | SRR11611656 |
| J621.C | INFZ | 4x | 38.061  | -76.3374474  | 34.98292137 | 263504887 | SRR11611657 |
| J621.B | INFY | 4x | 38.061  | -76.3374474  | 36.23981212 | 272972274 | SRR11611658 |
| J621.A | INFX | 4x | 38.061  | -76.3374474  | 37.19688169 | 280181292 | SRR11611659 |
| J619.A | INFV | 4x | 42.8311 | -70.86361    | 37.40967494 | 281784133 | SRR11611660 |
| J617.A | INFU | 4x | 41.3364 | -72.03365    | 37.60367016 | 283245380 | SRR11611661 |
| J613.C | INFP | 4x | 35.9082 | -75.6757302  | 38.68969953 | 291425773 | SRR11611666 |
| J613.B | INFN | 4x | 35.9082 | -75.6757302  | 36.93690008 | 278223010 | SRR11611667 |
| J613.A | INFM | 4x | 35.9082 | -75.6757302  | 37.82273911 | 284895492 | SRR11611668 |
| J612.C | INFL | 4x | 41.4558 | -71.453889   | 37.42120568 | 281870987 | SRR11611669 |
| J612.A | INFK | 4x | 41.4558 | -71.453889   | 36.32573721 | 273619495 | SRR11611670 |
| J610.C | INFJ | 4x | 29.9334 | -99.234241   | 37.32785439 | 281167829 | SRR11611671 |
| J610.B | INFI | 4x | 29.9334 | -99.234241   | 40.09346325 | 301999464 | SRR11611672 |
| J610.A | INFH | 4x | 29.9334 | -99.234241   | 38.52377576 | 290175971 | SRR11611673 |
| J609.C | INFG | 4x | 33.1668 | -79.6664612  | 37.73950042 | 284268506 | SRR11611674 |
| J609.B | INFF | 4x | 33.1668 | -79.6664612  | 37.56878799 | 282982634 | SRR11611675 |
| J609.A | INFE | 4x | 33.1668 | -79.6664612  | 37.66414077 | 283700868 | SRR11611676 |
| J608.A | INFD | 4x | NA      | NA           | 36.69379639 | 276391859 | SRR11611677 |
| J607.B | INFC | 4x | 41.5746 | -71.45391389 | 25.55217278 | 192468843 | SRR11611678 |
| J607.A | INFB | 4x | 41.5746 | -71.45391389 | 37.26723257 | 280711202 | SRR11611679 |
| J606.B | INFA | 4x | 42.7431 | -70.8134     | 37.4467446  | 282063356 | SRR11611680 |
| J605.C | INEZ | 4x | 41.3149 | -72.03216944 | 37.78793168 | 284633309 | SRR11611681 |
| J605.B | INEY | 4x | 41.3149 | -72.03216944 | 38.30416462 | 288521775 | SRR11611682 |

|        |      |    |         |              |             |           |             |
|--------|------|----|---------|--------------|-------------|-----------|-------------|
| J605.A | INEX | 4x | 41.3149 | -72.03216944 | 37.34275273 | 281280049 | SRR11611683 |
| J603.C | INEW | 4x | 33.2592 | -79.6102     | 37.54462354 | 282800618 | SRR11611684 |
| J603.B | INEU | 4x | 33.2592 | -79.6102     | 37.89761419 | 285459480 | SRR11611685 |
| J603.A | INET | 4x | 33.2592 | -79.6102     | 37.78710074 | 284627050 | SRR11611686 |
| J600.B | IMJC | 4x | 38.2649 | -75.66383333 | 35.157925   | 264823082 | SRR11611688 |
| J600.A | IMJB | 4x | 38.2649 | -75.66383333 | 37.43926955 | 282007051 | SRR11611689 |
| J599.C | IMJA | 4x | 38.4072 | -76.05972222 | 32.73551707 | 246576569 | SRR11611690 |
| J599.B | IMIZ | 4x | 38.4072 | -76.05972222 | 37.05975822 | 279148425 | SRR11611691 |
| J599.A | IMIY | 4x | 38.4072 | -76.05972222 | 32.29248497 | 243239480 | SRR11611692 |
| J598.C | IMIX | 4x | 38.7724 | -75.97663889 | 37.25377933 | 280609867 | SRR11611693 |
| J598.B | IMIW | 4x | 38.7724 | -75.97663889 | 37.1512518  | 279837590 | SRR11611694 |
| J602.B | IMIT | 4x | 33.3519 | -79.1937     | 36.85022437 | 277570135 | SRR11611696 |
| J597.C | IMIS | 4x | 39.0535 | -76.22113889 | 36.93455634 | 278205356 | SRR11611697 |
| J597.B | IMIQ | 4x | 39.0535 | -76.22113889 | 33.75172022 | 254231004 | SRR11611699 |
| J601.B | IMIP | 4x | 38.7558 | -76.15558333 | 37.23297583 | 280453167 | SRR11611700 |
| J597.A | IMIN | 4x | 39.0535 | -76.22113889 | 36.53844324 | 275221679 | SRR11611701 |
| J601.A | IMIM | 4x | 38.7558 | -76.15558333 | 35.74466507 | 269242635 | SRR11611702 |
| J596.C | IMIL | 4x | 38.9524 | -76.23372222 | 36.88659558 | 277844097 | SRR11611703 |
| J596.A | IJBV | 4x | 38.9524 | -76.23372222 | 37.7079808  | 284031088 | SRR11611704 |
| J595.C | IJBX | 4x | 35.8711 | -75.9798333  | 37.51436832 | 282572724 | SRR11611705 |
| J595.B | IJBW | 4x | 35.8711 | -75.9798333  | 33.60276411 | 253109009 | SRR11611706 |
| J595.A | IJBU | 4x | 35.8711 | -75.9798333  | 38.39280598 | 289189456 | SRR11611707 |
| J593.B | IJBR | 4x | 35.5995 | -75.84758333 | 37.17410366 | 280009719 | SRR11611709 |
| J593.A | IJBQ | 4x | 35.5995 | -75.84758333 | 13.73592089 | 103464266 | SRR11611710 |
| J592.B | IJBP | 4x | 40.7698 | -72.89763889 | 21.64966715 | 163073662 | SRR11611711 |
| J592.A | IJBN | 4x | 40.7698 | -72.89763889 | 37.59197334 | 283157275 | SRR11611712 |
| J591.B | IJBM | 4x | 36.6723 | -75.91636111 | 33.39833222 | 251569149 | SRR11611713 |
| J591.A | IJBL | 4x | 36.6723 | -75.91636111 | 38.27624305 | 288311459 | SRR11611714 |
| J590.B | IJBK | 4x | 37.4559 | -75.83288889 | 33.92530505 | 255538512 | SRR11611715 |
| J589.C | IJBH | 4x | 37.9075 | -75.35108333 | 38.01010469 | 286306802 | SRR11611716 |
| J589.B | IJBI | 4x | 37.9075 | -75.35108333 | 37.51370266 | 282567710 | SRR11611717 |
| J588.B | IJBH | 4x | 38.6367 | -77.23441667 | 35.37612172 | 266466624 | SRR11611718 |
| J588.A | IJBG | 4x | 38.6367 | -77.23441667 | 36.35417043 | 273833665 | SRR11611719 |
| J587.C | IJBF | 4x | 34.0862 | -81.11703    | 35.30384423 | 265922202 | SRR11611720 |
| J586.C | IJBE | 4x | 33.508  | -79.06522    | 35.43300395 | 266895083 | SRR11611721 |
| J586.B | IJBD | 4x | 33.508  | -79.06522    | 37.24281335 | 280527267 | SRR11611722 |
| J585.B | IJBC | 4x | 32.8647 | -79.83733    | 34.95249781 | 263275725 | SRR11611723 |
| J583.C | IJBB | 4x | 41.6361 | -87.4364722  | 33.36246843 | 251299009 | SRR11611724 |
| J582.C | IJBA | 4x | 41.365  | -88.1866944  | 35.312927   | 265990617 | SRR11611725 |
| J582.A | IJAZ | 4x | 41.365  | -88.1866944  | 31.94729305 | 240639361 | SRR11611726 |
| J581.C | IJAY | 4x | 42.0596 | -87.84222222 | 35.21946074 | 265286593 | SRR11611727 |
| J538.A | IJAW | 4x | 41.0171 | -72.001407   | 35.96319076 | 270888655 | SRR11611728 |
| J276.B | IJAS | 4x | 29.3247 | -101.3645    | 32.82642783 | 247261344 | SRR11611731 |
| J274.A | IJAQ | 4x | 29.3247 | -101.3645    | 37.95115737 | 285862788 | SRR11611733 |
| J272.A | IJAP | 4x | 29.3247 | -101.3645    | 37.96364386 | 285956841 | SRR11611734 |
| J271.A | IJAN | 4x | 29.3247 | -101.3645    | 40.11497171 | 302161474 | SRR11611735 |
| J268.A | IJAM | 4x | 29.3247 | -101.3645    | 39.26179178 | 295734993 | SRR11611736 |
| J574.B | IIMM | 4x | 40.9817 | -72.616528   | 39.30996947 | 296097886 | SRR11611796 |
| J542.B | IIMK | 4x | 41.0323 | -72.196464   | 18.68760741 | 140762283 | SRR11611797 |
| J541.B | IIMJ | 4x | 41.0157 | -72.020153   | 32.71005568 | 246384784 | SRR11611798 |
| J541.A | IIMI | 4x | 41.0157 | -72.020153   | 18.38079867 | 138451281 | SRR11611799 |
| J540.C | IIMH | 4x | 41.0171 | -72.001407   | 38.01744394 | 286362084 | SRR11611800 |
| J540.B | IIMG | 4x | 41.0171 | -72.001407   | 38.64240018 | 291069496 | SRR11611801 |
| J527.C | IIMB | 4x | 40.9089 | -72.446203   | 35.50964978 | 267472409 | SRR11611805 |
| J527.A | IILZ | 4x | 40.9089 | -72.446203   | 26.45179628 | 199245155 | SRR11611807 |
| J526.C | IILY | 4x | 40.966  | -72.133468   | 39.14355316 | 294844374 | SRR11611808 |
| J526.A | IILX | 4x | 40.966  | -72.133468   | 35.43479396 | 266908566 | SRR11611809 |
| J522.C | IILW | 4x | 39.644  | -74.644024   | 36.24026072 | 272975653 | SRR11611810 |
| J522.B | IILU | 4x | 39.644  | -74.644024   | 38.41413481 | 289350113 | SRR11611811 |
| J521.C | IILT | 4x | 39.9653 | -74.311821   | 25.95218889 | 195481919 | SRR11611812 |
| J521.B | IILS | 4x | 39.9653 | -74.311821   | 31.05663722 | 233930597 | SRR11611813 |
| J517.C | IILR | 4x | 40.9834 | -72.615855   | 33.89608602 | 255318423 | SRR11611814 |
| J517.B | IILQ | 4x | 40.9834 | -72.615855   | 36.90586331 | 277989229 | SRR11611815 |
| J515.C | IILN | 4x | 42.6767 | -70.75944444 | 37.72179913 | 284135173 | SRR11611817 |
| J489.A | IILK | 4x | 37.7367 | -94.32752778 | 34.47794158 | 259701184 | SRR11611818 |
| J481.A | IILJ | 4x | 33.3972 | -92.41386111 | 36.84494795 | 277530391 | SRR11611819 |
| J469.C | IILH | 4x | 30.8469 | -86.73777778 | 39.88121366 | 300400718 | SRR11611820 |
| J465.C | IILG | 4x | 30.8447 | -93.56707    | 39.12278484 | 294687939 | SRR11611822 |
| J465.A | IILF | 4x | 30.8447 | -93.56707    | 25.36948261 | 191092750 | SRR11611823 |
| J461.A | IILD | 4x | 30.2988 | -89.40688    | 31.23790181 | 235295952 | SRR11611825 |
| J460.B | IILB | 4x | 30.7258 | -88.73723    | 36.72890067 | 276656278 | SRR11611827 |
| J460.A | IILA | 4x | 30.7258 | -88.73723    | 32.37792018 | 243883011 | SRR11611828 |
| J458.B | IILK | 4x | 30.87   | -86.92861111 | 33.20648572 | 250124087 | SRR11611829 |
| J458.A | IILY | 4x | 30.87   | -86.92861111 | 37.10850572 | 279515610 | SRR11611830 |
| J456.C | IILX | 4x | 30.9    | -86.49361111 | 39.07340833 | 294316016 | SRR11611831 |
| J456.B | IILW | 4x | 30.9    | -86.49361111 | 40.47195883 | 304850439 | SRR11611832 |
| J456.A | IILV | 4x | 30.9    | -86.49361111 | 37.82134765 | 284885011 | SRR11611833 |
| J455.B | IILT | 4x | 38.08   | -75.33       | 31.51522441 | 237384853 | SRR11611834 |
| J434.A | IILK | 4x | 40.94   | -72.28       | 36.13248677 | 272163858 | SRR11611840 |
| J432.B | IILJ | 4x | 41.04   | -71.93       | 36.89611474 | 277915799 | SRR11611841 |
| J429.B | IILH | 4x | 41.04   | -71.93       | 34.03591235 | 256371649 | SRR11611843 |
| J421.B | IILF | 4x | 43.09   | -86.25       | 30.43072418 | 229215978 | SRR11611844 |

|        |      |    |         |              |             |           |             |
|--------|------|----|---------|--------------|-------------|-----------|-------------|
| J421.A | IIKE | 4x | 43.09   | -86.25       | 38.39548826 | 289209660 | SRR11611845 |
| J420.B | IIKD | 4x | 43      | -86          | 33.66749858 | 253596614 | SRR11611846 |
| J416.A | IIKA | 4x | 40.6    | -74.13       | 37.20169664 | 280217560 | SRR11611849 |
| J412.A | IIJX | 4x | 42.55   | -87.8        | 36.00282853 | 271187222 | SRR11611850 |
| J409.A | IIJW | 4x | 43.2    | -90.45       | 32.18458252 | 242426717 | SRR11611851 |
| J406.A | IIJU | 4x | 43.47   | -89.43       | 30.20026455 | 227480067 | SRR11611852 |
| J400.B | IIJT | 4x | 42.93   | -78.18       | 30.97030602 | 233280317 | SRR11611853 |
| J390.B | IIJR | 4x | 40.3    | -86.22       | 37.37770885 | 281543352 | SRR11611854 |
| J387.B | IIJQ | 4x | 38.5506 | -93.29858333 | 30.12738101 | 226931080 | SRR11611855 |
| J382.B | IIJP | 4x | 42.1824 | -85.825225   | 27.77142266 | 209185091 | SRR11611856 |
| J382.A | IIJN | 4x | 42.1824 | -85.825225   | 37.21777587 | 280338675 | SRR11611857 |
| J380.B | IIJM | 4x | 44.0571 | -86.5084083  | 39.44668431 | 297127675 | SRR11611858 |
| J379.B | IIJL | 4x | 42.6484 | -82.5286806  | 36.27167984 | 273212314 | SRR11611859 |
| J378.C | IIJK | 4x | 43.0086 | -86.2212222  | 36.48738558 | 274837093 | SRR11611860 |
| J357.C | IIJJ | 4x | 41.3473 | -88.1386     | 34.95969832 | 263329962 | SRR11611861 |
| J355.B | IIJI | 4x | 41.3473 | -88.1386     | 36.9336533  | 278198554 | SRR11611862 |
| J354.B | IIJH | 4x | 41.3597 | -88.3254333  | 38.88632061 | 292906799 | SRR11611863 |
| J353.A | IIJG | 4x | 39.8543 | -83.5308     | 38.94128566 | 293320817 | SRR11611864 |
| J351.C | IIJF | 4x | 40.7319 | -83.0926167  | 36.99236604 | 278640801 | SRR11611865 |
| J349.C | IIJE | 4x | 40.6203 | -83.02145    | 37.16355109 | 279930233 | SRR11611866 |
| J349.B | IIJD | 4x | 40.6203 | -83.02145    | 36.69742326 | 276419178 | SRR11611867 |
| J349.A | IIJC | 4x | 40.6203 | -83.02145    | 35.55843472 | 267839876 | SRR11611868 |
| J348.B | IIJB | 4x | 40.6203 | -83.02145    | 34.22493757 | 257795460 | SRR11611869 |
| J344.A | IIJA | 4x | 41.3046 | -88.1723167  | 36.85058149 | 277572825 | SRR11611870 |
| J267.C | IIIS | 4x | 45.4182 | -93.7014     | 36.48963759 | 274854056 | SRR11611877 |
| J267.B | IIIR | 4x | 45.4182 | -93.7014     | 36.9409871  | 278253795 | SRR11611878 |
| J267.A | IIIQ | 4x | 45.4182 | -93.7014     | 31.17501338 | 234822252 | SRR11611879 |
| J258.C | IIIP | 4x | 45.3815 | -93.1641     | 28.96095654 | 218145120 | SRR11611880 |
| J258.B | IIIN | 4x | 45.3815 | -93.1641     | 36.67324792 | 276237080 | SRR11611881 |
| J537.C | IIBQ | 4x | 41.0171 | -72.001407   | 37.38221804 | 281577317 | SRR11611884 |
| J193.A | IELT | 4x | 34.3211 | -78.41128333 | 38.94473437 | 293346794 | SRR11611887 |
| J189.A | IELS | 4x | 29.7625 | -85.40277778 | 35.17828469 | 264976439 | SRR11611888 |
| J186.A | IELR | 4x | 29.9858 | -84.38666667 | 35.27921724 | 265736702 | SRR11611889 |
| J172.A | IELQ | 4x | 40.5758 | -74.15805556 | 36.49866594 | 274922061 | SRR11611890 |
| J171.A | IELP | 4x | 40.9849 | -72.615117   | 36.01329467 | 271266057 | SRR11611891 |
| J164.A | IELN | 4x | 27.4756 | -80.29555556 | 34.30889728 | 258427877 | SRR11611892 |
| J026.A | IELH | 4x | 34.2257 | -77.94471    | 37.00913283 | 278767095 | SRR11611897 |
| J019.A | IELE | 4x | 27.7484 | -80.436163   | 37.97626336 | 286051896 | SRR11611900 |
| J026.C | IHAD | 4x | 34.2257 | -77.94471    | 37.47577922 | 282282056 | SRR11611907 |
| J425.A | IIAA | 4x | 40.5    | -74.22       | 37.26939709 | 280727506 | SRR11611909 |
| J461.C | IHZY | 4x | 30.2988 | -89.40688    | 29.99191159 | 225910672 | SRR11611911 |
| J204.A | IHZX | 4x | 34.7061 | -77.648133   | 36.78807474 | 277102000 | SRR11611912 |
| J350.C | IHZU | 4x | 40.7319 | -83.0926167  | 35.51645227 | 267523648 | SRR11611914 |
| J357.B | IHZQ | 4x | 41.3473 | -88.1386     | 32.50167524 | 244815182 | SRR11611918 |
| J586.A | IHZM | 4x | 33.508  | -79.06522    | 16.35639819 | 123202714 | SRR11611921 |
| J458.C | IHZK | 4x | 30.87   | -86.92861111 | 17.55452841 | 132227494 | SRR11611922 |
| J336.A | IHZD | 4x | 29.8711 | -96.280086   | 17.63363375 | 132823346 | SRR11611927 |
| J350.B | IHZB | 4x | 40.7319 | -83.0926167  | 16.69944949 | 125786709 | SRR11611929 |
| J354.C | IHYX | 4x | 41.3597 | -88.3254333  | 35.6738733  | 268709404 | SRR11611932 |
| J396.A | IHYW | 4x | 43.8    | -91.83       | 35.36106726 | 266353228 | SRR11611933 |
| J585.C | IHYT | 4x | 32.8647 | -79.83733    | 37.0703935  | 279228534 | SRR11611934 |
| J353.C | IHYL | 4x | 39.8543 | -83.5308     | 35.38976228 | 266569370 | SRR11611939 |
| J348.C | IHYH | 4x | 40.6203 | -83.02145    | 35.59114706 | 268086278 | SRR11611943 |
| J262.A | IHYF | 4x | 43.9345 | -95.7229     | 28.91118082 | 217770190 | SRR11611944 |
| J538.C | IHYE | 4x | 41.0171 | -72.001407   | 32.94652416 | 248165956 | SRR11611945 |
| J394.B | IHYC | 4x | 42.3    | -84.28       | 36.28470958 | 273310459 | SRR11611946 |
| J585.A | IHYA | 4x | 32.8647 | -79.83733    | 37.15660256 | 279877894 | SRR11611948 |
| J430.B | IHXY | 4x | 41.04   | -71.93       | 31.10715122 | 234311088 | SRR11611950 |
| J258.A | IHXU | 4x | 45.3815 | -93.1641     | 35.41318514 | 266745800 | SRR11611953 |
| J352.C | IHXS | 4x | 39.8391 | -83.5731     | 34.11385724 | 256958760 | SRR11611955 |
| J348.A | IHXN | 4x | 40.6203 | -83.02145    | 33.57612037 | 252908318 | SRR11611959 |
| J430.A | IHXM | 4x | 41.04   | -71.93       | 36.06624827 | 271664924 | SRR11611960 |
| J525.B | IHXX | 4x | 40.9027 | -72.570629   | 34.87248081 | 262673006 | SRR11611962 |
| J386.B | IHXI | 4x | 38.5484 | -93.25808611 | 34.49756537 | 259848998 | SRR11611963 |
| J584.B | IHXG | 4x | 32.3436 | -80.45525    | 37.75242328 | 284365846 | SRR11611965 |
| J352.B | IHWZ | 4x | 39.8391 | -83.5731     | 33.4734071  | 252134642 | SRR11611971 |
| J311.A | IHWX | 4x | 29.4201 | -98.572102   | 38.21136813 | 287822796 | SRR11611973 |
| J584.A | IHWV | 4x | 32.3436 | -80.45525    | 36.97884443 | 278538951 | SRR11611974 |
| J428.B | IHWT | 4x | 40.72   | -73.58       | 33.83364963 | 254848128 | SRR11611976 |
| J488.C | IHWR | 4x | 37.0072 | -94.34954444 | 35.50493083 | 267436864 | SRR11611978 |
| J384.C | IHWP | 4x | 38.4816 | -93.22158333 | 35.35807538 | 266330692 | SRR11611979 |
| J344.C | IHWJ | 4x | 41.3046 | -88.1723167  | 36.7592986  | 276885247 | SRR11611984 |
| J352.A | IHWF | 4x | 39.8391 | -83.5731     | 36.32828421 | 273638680 | SRR11611988 |
| J358.A | IGSD | 4x | 41.3892 | -88.1946167  | 29.72407072 | 223893191 | SRR11611989 |
| J376.C | IGSB | 4x | 43.0086 | -86.2064167  | 34.11703777 | 256982717 | SRR11611990 |
| J482.C | IGSA | 4x | 33.1498 | -92.07574167 | 36.37531034 | 273992899 | SRR11611991 |
| J327.A | IGRZ | 4x | 28.8053 | -97.003598   | 26.36536259 | 198594103 | SRR11611992 |
| J385.A | IGRX | 4x | 38.5321 | -93.29148333 | 18.88699056 | 142264114 | SRR11611993 |
| J180.A | IGRW | 4x | 29.365  | -81.08472222 | 30.67892864 | 231085550 | SRR11611994 |
| J429.A | IGRU | 4x | 41.04   | -71.93       | 37.99663473 | 286205341 | SRR11611995 |
| J257.A | IGRT | 4x | 44.7922 | -93.2744     | 39.02688828 | 293965609 | SRR11611996 |
| J400.A | IGRS | 4x | 42.93   | -78.18       | 23.65517694 | 178179937 | SRR11611997 |

|        |      |    |         |              |              |           |             |
|--------|------|----|---------|--------------|--------------|-----------|-------------|
| J455.A | IGRQ | 4x | 38.08   | -75.33       | 36.51657314  | 275056945 | SRR11611999 |
| J306.A | IGRP | 4x | 30.874  | -99.049946   | 23.88803514  | 179933915 | SRR11612000 |
| J542.C | IGRM | 4x | 41.0323 | -72.196464   | 25.73289279  | 193830096 | SRR11612002 |
| J384.B | IGRL | 4x | 38.4816 | -93.22158333 | 30.96104614  | 233210568 | SRR11612003 |
| J355.C | IGRJ | 4x | 41.3473 | -88.1386     | 36.16695115  | 272423457 | SRR11612004 |
| J530.C | IGRI | 4x | 41.1661 | -74.26833333 | 32.51012064  | 244878796 | SRR11612005 |
| J374.B | IGRH | 4x | 42.6577 | -85.8898056  | 33.91720469  | 255477497 | SRR11612006 |
| J481.B | IGRG | 4x | 33.3972 | -92.41386111 | 37.78657753  | 284623109 | SRR11612007 |
| J323.A | IGRF | 4x | 28.6911 | -95.968271   | 37.30624663  | 281005071 | SRR11612008 |
| J305.A | IGRE | 4x | 28.117  | -96.800263   | 35.59001754  | 268077770 | SRR11612009 |
| J177.A | IGRC | 4x | 30.4369 | -81.41333333 | 40.06844289  | 301811001 | SRR11612011 |
| J253.A | IGRA | 4x | 45.565  | -92.825      | 22.54194199  | 169794621 | SRR11612013 |
| J394.A | IGQZ | 4x | 42.3    | -84.28       | 20.76921605  | 156441764 | SRR11612014 |
| J029.B | IGQY | 4x | 39.223  | -74.992585   | 36.14209223  | 272236210 | SRR11612015 |
| J450.B | IGQX | 4x | 39.82   | -74.53       | 35.905596    | 270454829 | SRR11612016 |
| J470.A | IGQW | 4x | 36.3557 | -94.14363889 | 37.2250324   | 280393334 | SRR11612017 |
| J313.A | IGQU | 4x | 29.7752 | -95.31025    | 39.74614531  | 299383331 | SRR11612018 |
| J538.B | IGQT | 4x | 41.0171 | -72.001407   | 34.62545459  | 260812309 | SRR11612019 |
| J384.A | IGQS | 4x | 38.4816 | -93.22158333 | 36.60290793  | 275707252 | SRR11612020 |
| J489.C | IGQR | 4x | 37.7367 | -94.32752778 | 28.26773322  | 212923494 | SRR11612021 |
| J355.A | IGQQ | 4x | 41.3473 | -88.1386     | 35.70563813  | 268948669 | SRR11612022 |
| J525.C | IGQP | 4x | 40.9027 | -72.570629   | 36.2089235   | 272739609 | SRR11612023 |
| J374.A | IGQN | 4x | 42.6577 | -85.8898056  | 32.48453167  | 244686050 | SRR11612024 |
| J293.A | IGQK | 4x | 29.59   | -98.54       | 40.73106144  | 306802100 | SRR11612027 |
| J416.B | IGQJ | 4x | 40.6    | -74.13       | 37.30722109  | 281012411 | SRR11612028 |
| J427.B | IGQH | 4x | 40.62   | -74.18       | 24.38633431  | 183687297 | SRR11612029 |
| J194.A | IGQG | 4x | 35.5795 | -75.84906667 | 25.14108395  | 189372363 | SRR11612030 |
| J393.A | IGQF | 4x | 41.63   | -87.43       | 34.01527919  | 256216232 | SRR11612031 |
| J521.A | IGQE | 4x | 39.9653 | -74.311821   | 27.19184925  | 204819520 | SRR11612032 |
| J371.A | IGQD | 4x | 44.0851 | -86.4375139  | 37.77283195  | 284519572 | SRR11612033 |
| J469.A | IGQC | 4x | 30.8469 | -86.73777778 | 34.74995311  | 261750080 | SRR11612034 |
| J307.A | IGQB | 4x | 29.2684 | -98.046518   | 39.0131188   | 293861892 | SRR11612035 |
| J537.B | IGQA | 4x | 41.0171 | -72.001407   | 25.17972655  | 189663434 | SRR11612036 |
| J381.A | IGPZ | 4x | 42.3346 | -86.300584   | 32.27117433  | 243078960 | SRR11612037 |
| J489.B | IGPY | 4x | 37.7367 | -94.32752778 | 30.37263542  | 228778431 | SRR11612038 |
| J353.B | IGPX | 4x | 39.8543 | -83.5308     | 34.7905202   | 262055647 | SRR11612039 |
| J191.A | IGPW | 4x | 30.5392 | -87.04972222 | 36.44012738  | 274481126 | SRR11612040 |
| J387.C | IGPU | 4x | 38.5506 | -93.29858333 | 26.51645839  | 199732215 | SRR11612041 |
| J434.B | IGPS | 4x | 40.94   | -72.28       | 25.93506205  | 195352913 | SRR11612043 |
| J264.A | IGPR | 4x | 43.7884 | -91.8088     | 33.56140524  | 252797478 | SRR11612044 |
| J415.B | IGPQ | 4x | 44.33   | -89.6        | 33.37672181  | 251406371 | SRR11612045 |
| J169.A | IGPP | 4x | 40.6782 | -73.944158   | 35.29731482  | 265873020 | SRR11612046 |
| J427.A | IGPN | 4x | 40.62   | -74.18       | 29.55740216  | 222637779 | SRR11612047 |
| J483.C | IGPM | 4x | 33.085  | -92.07030556 | 37.5898144   | 283141013 | SRR11612048 |
| J351.B | IGPL | 4x | 40.7319 | -83.0926167  | 37.89196777  | 285416949 | SRR11612049 |
| J517.A | IGPK | 4x | 40.9834 | -72.615855   | 31.2263493   | 235208934 | SRR11612050 |
| J365.B | IGPJ | 4x | 40.5029 | -95.21866667 | 33.01610516  | 248690067 | SRR11612051 |
| J465.B | IGPI | 4x | 30.8447 | -93.56707    | 25.36959041  | 191093562 | SRR11612052 |
| J306.C | IGPH | 4x | 30.874  | -99.049946   | 28.69642577  | 216152572 | SRR11612053 |
| J534.C | IGPG | 4x | 40.5856 | -74.11888889 | 34.61189979  | 260710209 | SRR11612054 |
| J379.A | IGPF | 4x | 42.6484 | -82.5286806  | 31.34844792  | 236128628 | SRR11612055 |
| J422.B | IGPD | 4x | 40.68   | -74.01       | 35.11684639  | 264513662 | SRR11612056 |
| J188.A | IGPC | 4x | 29.6856 | -85.36888889 | 38.63830652  | 291038661 | SRR11612057 |
| J387.A | IGPB | 4x | 38.5506 | -93.29858333 | 36.10131631  | 271929070 | SRR11612058 |
| J433.B | IGNZ | 4x | 41.02   | -72.01       | 31.3146897   | 235874348 | SRR11612060 |
| J263.A | IGNY | 4x | 44.1161 | -96.1506     | 19.77141756  | 148925960 | SRR11612061 |
| J409.B | IGNX | 4x | 43.2    | -90.45       | 33.85653654  | 255020521 | SRR11612062 |
| J534.A | IGNW | 4x | 40.5856 | -74.11888889 | 33.58870974  | 253003146 | SRR11612063 |
| J378.B | IGNU | 4x | 43.0086 | -86.2212222  | 25.56829768  | 192590302 | SRR11612064 |
| J483.B | IGNT | 4x | 33.085  | -92.07030556 | 37.43574331  | 281980490 | SRR11612065 |
| J335.A | IGNS | 4x | 29.6833 | -96.286172   | 32.77920561  | 246905648 | SRR11612066 |
| J516.C | IGNR | 4x | 40.7592 | -72.792639   | 33.67593733  | 253660178 | SRR11612067 |
| J359.B | IGNQ | 4x | 41.2688 | -96.17653611 | 33.70595558  | 253886287 | SRR11612068 |
| J461.B | IGNP | 4x | 30.2988 | -89.40688    | 31.56456375  | 237756496 | SRR11612069 |
| J306.B | IGNN | 4x | 30.874  | -99.049946   | 32.411128769 | 244134348 | SRR11612070 |
| J259.A | IGNM | 4x | 44.2662 | -94.0022     | 23.23885032  | 175044004 | SRR11612071 |
| J407.B | IGNL | 4x | 42.57   | -90.4        | 17.49659326  | 131791104 | SRR11612072 |
| J182.A | IGNI | 4x | 28.7789 | -81.16583333 | 21.3106499   | 160520053 | SRR11612074 |
| J386.C | IGNH | 4x | 38.5484 | -93.25808611 | 27.37756303  | 206218388 | SRR11612075 |
| J431.A | IGNF | 4x | 40.72   | -73.58       | 22.66463683  | 170718806 | SRR11612077 |
| J577.B | IFBF | 4x | 32.2968 | -81.10216667 | 36.50937622  | 275002735 | SRR11612078 |
| J576.C | IFBE | 4x | 31.8202 | -81.25658333 | 37.62329422  | 283393196 | SRR11612079 |
| J576.B | IFBD | 4x | 31.8202 | -81.25658333 | 35.21383623  | 265244227 | SRR11612080 |
| J536.C | IFBC | 4x | 41.1045 | -73.451446   | 34.53894655  | 260160697 | SRR11612081 |
| J530.B | IFBB | 4x | 41.1661 | -74.26833333 | 37.10270663  | 279471929 | SRR11612082 |
| J526.B | IFBA | 4x | 40.966  | -72.133468   | 34.70347528  | 261399991 | SRR11612083 |
| J504.C | IFAZ | 4x | 31.1699 | -89.7297778  | 38.07177214  | 286771305 | SRR11612084 |
| J502.C | IFAX | 4x | 30.3765 | -88.6338056  | 38.41030614  | 289321274 | SRR11612085 |
| J500.C | IFAW | 4x | 30.2629 | -89.4059444  | 38.59206036  | 290690317 | SRR11612086 |
| J500.B | IFAU | 4x | 30.2629 | -89.4059444  | 38.22072081  | 287893244 | SRR11612087 |
| J499.C | IFAT | 4x | 30.3481 | -90.0571944  | 37.44295696  | 282034826 | SRR11612088 |
| J499.A | IFAS | 4x | 30.3481 | -90.0571944  | 38.32035935  | 288643760 | SRR11612089 |

|         |       |    |         |              |             |           |             |
|---------|-------|----|---------|--------------|-------------|-----------|-------------|
| J498.C  | IFAR  | 4x | 30.2842 | -89.9177778  | 39.12252477 | 294685980 | SRR11612090 |
| J498.B  | IFAQ  | 4x | 30.2842 | -89.9177778  | 38.1219946  | 287149600 | SRR11612091 |
| J497.B  | IFAN  | 4x | 29.1757 | -90.1293889  | 37.66559556 | 283711826 | SRR11612092 |
| J496.C  | IFAM  | 4x | 29.2618 | -89.9519722  | 38.71596836 | 291623640 | SRR11612093 |
| J491.C  | IFAL  | 4x | 38.0496 | -93.96668333 | 35.94254644 | 270733154 | SRR11612094 |
| J491.B  | IFAK  | 4x | 38.0496 | -93.96668333 | 35.15011712 | 264764270 | SRR11612095 |
| J490.C  | IFAJ  | 4x | 37.9064 | -94.01095    | 33.19367372 | 250027582 | SRR11612096 |
| J488.B  | IFAI  | 4x | 37.0072 | -94.34954444 | 36.10967993 | 271992068 | SRR11612097 |
| J488.A  | IFAH  | 4x | 37.0072 | -94.34954444 | 36.01975836 | 271314744 | SRR11612098 |
| J482.B  | IFAE  | 4x | 33.1498 | -92.07574167 | 38.16962864 | 287508398 | SRR11612100 |
| J482.A  | IFAD  | 4x | 33.1498 | -92.07574167 | 37.30925936 | 281027764 | SRR11612101 |
| J481.C  | IFAC  | 4x | 33.3972 | -92.41386111 | 36.81292185 | 277289158 | SRR11612102 |
| J477.C  | IFAB  | 4x | 34.5866 | -92.25368333 | 34.78222681 | 261993178 | SRR11612103 |
| J471.C  | IEZZ  | 4x | 36.2186 | -94.48219444 | 36.05289819 | 271564366 | SRR11612104 |
| J470.B  | IEZW  | 4x | 36.3557 | -94.14363889 | 35.6574064  | 268585369 | SRR11612105 |
| J466.C  | IEZU  | 4x | 30.4435 | -90.41235    | 35.97400659 | 270970124 | SRR11612106 |
| J466.B  | IEZT  | 4x | 30.4435 | -90.41235    | 35.6526516  | 268549554 | SRR11612107 |
| J426.B  | IEZR  | 4x | 40.61   | -74.08       | 36.18124901 | 272531154 | SRR11612109 |
| J403.B  | IEZQ  | 4x | 44.02   | -91.48       | 35.2840505  | 265773108 | SRR11612110 |
| J393.B  | IEZP  | 4x | 41.63   | -87.43       | 35.477565   | 267230734 | SRR11612111 |
| J386.A  | IEZN  | 4x | 38.5484 | -93.25808611 | 33.28098283 | 250685228 | SRR11612112 |
| J385.B  | IEZM  | 4x | 38.5321 | -93.29148333 | 35.78494991 | 269546076 | SRR11612113 |
| J378.A  | IEZL  | 4x | 43.0086 | -86.2212222  | 34.98587515 | 263527136 | SRR11612114 |
| J376.B  | IEZK  | 4x | 43.0086 | -86.2064167  | 35.74806505 | 269268245 | SRR11612115 |
| J376.A  | IEZJ  | 4x | 43.0086 | -86.2064167  | 35.51566368 | 267517708 | SRR11612116 |
| J365.A  | IEZI  | 4x | 40.5037 | -95.22027778 | 35.72163532 | 269069166 | SRR11612117 |
| J339.A  | IEZF  | 4x | 29.8711 | -96.280086   | 39.35997448 | 296474543 | SRR11612119 |
| J326.B  | IEZE  | 4x | 29.2132 | -95.477781   | 37.83342351 | 284975971 | SRR11612120 |
| J250.C  | IEZB  | 4x | 30.33   | -98.12       | 37.60938442 | 283288422 | SRR11612123 |
| J250.B  | IEZA  | 4x | 30.33   | -98.12       | 35.8594502  | 270107241 | SRR11612124 |
| J205.L3 | IEYX  | 4x | 34.63   | -77.773433   | 35.96573883 | 270907848 | SRR11612126 |
| J205.L2 | IEYW  | 4x | 34.63   | -77.773433   | 35.45259655 | 267042662 | SRR11612127 |
| J205.L1 | IEYU  | 4x | 34.63   | -77.773433   | 35.51752006 | 267531691 | SRR11612128 |
| J193.L3 | IEYS  | 4x | 34.3211 | -78.41128333 | 35.84952148 | 270032454 | SRR11612130 |
| J193.L2 | IEYR  | 4x | 34.3211 | -78.41128333 | 35.60057063 | 268157260 | SRR11612131 |
| J193.L1 | IEYQ  | 4x | 34.3211 | -78.41128333 | 35.55215835 | 267792600 | SRR11612132 |
| J192.L3 | IEYP  | 4x | 34.0586 | -78.6312     | 36.73329954 | 276689412 | SRR11612133 |
| J192.L2 | IEYN  | 4x | 34.0586 | -78.6312     | 38.24235804 | 288056224 | SRR11612134 |
| J192.L1 | IEYM  | 4x | 34.0586 | -78.6312     | 31.90037379 | 240285947 | SRR11612135 |
| J192.A  | IEYL  | 4x | 34.0586 | -78.6312     | 33.44105653 | 251890965 | SRR11612136 |
| J188.L3 | IEYK  | 4x | 29.6856 | -85.36888889 | 36.94281003 | 278267526 | SRR11612137 |
| J188.L2 | IEYJ  | 4x | 29.6856 | -85.36888889 | 35.36391908 | 266374709 | SRR11612138 |
| J188.L1 | IEYI  | 4x | 29.6856 | -85.36888889 | 36.92294952 | 278117929 | SRR11612139 |
| J186.L1 | IEYH  | 4x | 29.9858 | -84.38666667 | 35.0924281  | 264329734 | SRR11612140 |
| J185.A  | IEYG  | 4x | 29.6942 | -83.27694444 | 36.11514274 | 272033216 | SRR11612141 |
| J181.A  | IEYF  | 4x | 29.095  | -80.97083333 | 37.28618301 | 280853944 | SRR11612142 |
| J180.L3 | IEYE  | 4x | 29.365  | -81.08472222 | 36.09616894 | 271890298 | SRR11612143 |
| J180.L2 | IEYD  | 4x | 29.365  | -81.08472222 | 36.49636547 | 274904733 | SRR11612144 |
| J180.L1 | IEYC  | 4x | 29.365  | -81.08472222 | 36.86493564 | 277680946 | SRR11612145 |
| J179.L3 | IEYB  | 4x | 29.5233 | -81.92888889 | 37.30586601 | 281002204 | SRR11612146 |
| J179.L2 | IEYA  | 4x | 29.5233 | -81.92888889 | 35.91938008 | 270558656 | SRR11612147 |
| J175.A  | IEXY  | 4x | 40.6017 | -74.06916667 | 38.31106469 | 288573749 | SRR11612148 |
| J174.A  | IEXX  | 4x | 42.6737 | -73.559413   | 37.79133512 | 284658945 | SRR11612149 |
| J173.A  | IEXW  | 4x | 40.6247 | -74.17888889 | 35.8773047  | 270241728 | SRR11612150 |
| J029.L2 | IEXP  | 4x | 39.223  | -74.992585   | 36.10728347 | 271974017 | SRR11612155 |
| J029.L1 | IEXN  | 4x | 39.223  | -74.992585   | 37.72968799 | 284194595 | SRR11612156 |
| J019.L3 | IEXL  | 4x | 27.7484 | -80.436163   | 37.59880278 | 283208717 | SRR11612158 |
| J019.L2 | IE XK | 4x | 27.7484 | -80.436163   | 36.89153053 | 277881269 | SRR11612159 |
| J019.L1 | IE XJ | 4x | 27.7484 | -80.436163   | 36.26826525 | 273186594 | SRR11612160 |
| J578.A  | IEPX  | 4x | 35.596  | -76.82933333 | 30.18990661 | 227402047 | SRR11612163 |
| J577.A  | IEPW  | 4x | 32.2968 | -81.10216667 | 36.14512473 | 272259052 | SRR11612164 |
| J576.A  | IEPU  | 4x | 31.8202 | -81.25658333 | 36.46833372 | 274693587 | SRR11612165 |
| J574.A  | IEPT  | 4x | 40.9817 | -72.616528   | 37.1723264  | 279996332 | SRR11612166 |
| J542.A  | IEPQ  | 4x | 41.0323 | -72.196464   | 21.90655771 | 165008661 | SRR11612167 |
| J540.A  | IEPP  | 4x | 41.0171 | -72.001407   | 34.00952417 | 256172883 | SRR11612168 |
| J535.A  | IEPL  | 4x | 30.2433 | -98.0064274  | 37.87014892 | 285252601 | SRR11612171 |
| J530.A  | IEPJ  | 4x | 41.1661 | -74.26833333 | 37.18689309 | 280106054 | SRR11612172 |
| J525.A  | IEPI  | 4x | 40.9027 | -72.570629   | 36.83506105 | 277455919 | SRR11612173 |
| J522.A  | IEPH  | 4x | 39.644  | -74.644024   | 36.69390897 | 276392707 | SRR11612174 |
| J516.A  | IEPG  | 4x | 40.7592 | -72.792639   | 36.13912796 | 272213882 | SRR11612175 |
| J514.A  | IEPF  | 4x | 30.4521 | -99.7995125  | 38.37415903 | 289049000 | SRR11612176 |
| J504.A  | IEPD  | 4x | 31.1699 | -89.7297778  | 38.8172903  | 292386836 | SRR11612177 |
| J503.A  | IEPC  | 4x | 31.1383 | -89.2423056  | 36.7030252  | 276461374 | SRR11612178 |
| J502.A  | IEPB  | 4x | 30.3765 | -88.6338056  | 38.21972856 | 287885770 | SRR11612179 |
| J501.A  | IEPA  | 4x | 30.3871 | -89.4609167  | 38.54817453 | 290359752 | SRR11612180 |
| J500.A  | IE NZ | 4x | 30.2629 | -89.4059444  | 34.67088906 | 261154539 | SRR11612181 |
| J498.A  | IE NX | 4x | 30.2842 | -89.9177778  | 38.04664544 | 286582041 | SRR11612182 |
| J497.A  | IE NW | 4x | 29.1757 | -90.1293889  | 36.49493883 | 274893987 | SRR11612183 |
| J496.A  | IE NU | 4x | 29.2618 | -89.9519722  | 36.79281268 | 277137688 | SRR11612184 |
| J490.A  | IE NT | 4x | 37.9064 | -94.01095    | 35.92557334 | 270605306 | SRR11612185 |
| J483.A  | IE NQ | 4x | 33.085  | -92.07030556 | 40.0149074  | 301407751 | SRR11612187 |
| J477.A  | IE NN | 4x | 34.5866 | -92.25368333 | 39.02258473 | 293933193 | SRR11612188 |

|         |       |    |         |              |             |           |             |
|---------|-------|----|---------|--------------|-------------|-----------|-------------|
| J466.A  | IENL  | 4x | 30.4435 | -90.41235    | 36.9900057  | 278623022 | SRR11612190 |
| J463.A  | IENK  | 4x | 30.4819 | -92.7992     | 38.37863915 | 289082746 | SRR11612191 |
| J426.A  | IENI  | 4x | 40.61   | -74.08       | 36.17315543 | 272470190 | SRR11612192 |
| J407.A  | IENG  | 4x | 42.57   | -90.4        | 35.01537948 | 263749374 | SRR11612194 |
| J403.A  | IENF  | 4x | 44.02   | -91.48       | 34.92650008 | 263079900 | SRR11612195 |
| J390.A  | IEND  | 4x | 40.3    | -86.22       | 34.54524017 | 260208103 | SRR11612197 |
| J359.A  | IENC  | 4x | 41.2688 | -96.17653611 | 37.34862908 | 281324312 | SRR11612198 |
| J340.A  | IENA  | 4x | 29.7752 | -95.31025    | 24.08564714 | 181422405 | SRR11612200 |
| J337.A  | IEMZ  | 4x | 29.8711 | -96.280086   | 39.78999847 | 299713650 | SRR11612201 |
| J331.A  | IEMY  | 4x | 29.5379 | -96.49298    | 36.88318988 | 277818444 | SRR11612202 |
| J330.A  | IEMX  | 4x | 28.2759 | -99.10135    | 37.93757151 | 285760454 | SRR11612203 |
| J329.A  | IEMW  | 4x | 28.9341 | -96.535645   | 38.42395228 | 289424062 | SRR11612204 |
| J326.A  | IEMU  | 4x | 29.2132 | -95.477781   | 38.8095403  | 292328460 | SRR11612205 |
| J324.A  | IEMT  | 4x | 28.6911 | -95.968271   | 39.1249418  | 294704186 | SRR11612206 |
| J319.A  | IEMS  | 4x | 28.6911 | -95.968271   | 40.33436937 | 303814062 | SRR11612207 |
| J314.A  | IEMQ  | 4x | 29.7752 | -95.31025    | 38.87051832 | 292787770 | SRR11612209 |
| J312.A  | IEMP  | 4x | 26.8697 | -97.698227   | 35.81672364 | 269785408 | SRR11612210 |
| J308.A  | IEMN  | 4x | 28.5674 | -97.351656   | 35.31218315 | 265985014 | SRR11612211 |
| J303.A  | IEMM  | 4x | 26.8697 | -97.698227   | 39.89616509 | 300513338 | SRR11612212 |
| J294.A  | IEMK  | 4x | 28.11   | -97.0291     | 35.82430025 | 269842478 | SRR11612214 |
| J283.A  | IEMJ  | 4x | 41.8598 | -88.253833   | 37.62730039 | 283423372 | SRR11612215 |
| J280.A  | IEMI  | 4x | 29.8988 | -100.99755   | 36.72084797 | 276595622 | SRR11612216 |
| J279.A  | IEMH  | 4x | 29.3247 | -101.3645    | 38.29090945 | 288421932 | SRR11612217 |
| J276.A  | IEMG  | 4x | 29.3247 | -101.3645    | 34.1164134  | 256978014 | SRR11612218 |
| J273.A  | IEMF  | 4x | 29.3247 | -101.3645    | 38.5697868  | 290522544 | SRR11612219 |
| J270.A  | IEME  | 4x | 29.3247 | -101.3645    | 38.27913603 | 288333250 | SRR11612220 |
| J256.A  | IEMD  | 4x | 42      | -93          | 34.58693187 | 260522141 | SRR11612221 |
| J254.A  | IEMC  | 4x | 42.496  | -87.808      | 36.69374674 | 276391485 | SRR11612222 |
| J250.A  | IEMA  | 4x | 30.33   | -98.12       | 40.31334057 | 303655665 | SRR11612224 |
| J205.A  | IELW  | 4x | 34.63   | -77.773433   | 35.8867543  | 270312906 | SRR11612226 |
| DVR3    | OBXC  | 4x | 29.9    | -100.992     | 38.15490966 | 287397529 | SRR1801295  |
| J209.B  | PZXW  | 4x | 28.11   | -97.0291     | 26.71530692 | 201230019 | SRR3452796  |
| I1029.1 | WZGC  | 4x | 29.3247 | -101.3645    | 41.73135941 | 314336731 | SRR4996399  |
| J170.A  | AOSTU | 4x | 40.9849 | -72.615117   | 20.18680742 | 152054837 | SRR8526526  |
| J190.A  | AOSUO | 4x | 30.3292 | -86.15333333 | 21.01470784 | 158290903 | SRR8526757  |
| J217.A  | AOSWH | 4x | 29.99   | -98.8184     | 15.76581379 | 118754204 | SRR8527273  |
| J248.A  | AOSXX | 4x | 26.94   | -97.6836     | 37.63204776 | 283459131 | SRR8529232  |
| J302.A  | ASHOA | 8x | 26.8697 | -97.698227   | 20.00373848 | 150675891 | SRR8841090  |
| J199.A  | IELU  | 8x | 32.0285 | -83.69826667 | 34.05726734 | 256532503 | SRS10484444 |
| J249.A  | IELY  | 6x | 30.15   | -97.69       | 36.02272661 | 271337102 | SRS10484445 |
| J485.A  | IENS  | 8x | 34.078  | -93.91188333 | 36.64002273 | 275986815 | SRS10484446 |
| J567.A  | IEPS  | 8x | 39.8711 | -79.49361111 | 34.26163298 | 258071864 | SRS10484447 |
| J030.A  | IEXR  | 8x | 38.4806 | -102.781863  | 35.32089274 | 266050618 | SRS10484448 |
| J179.L1 | IEXZ  | 8x | 29.5233 | -81.92888889 | 34.87650503 | 262703318 | SRS10484449 |
| J363.B  | IEZH  | 8x | 40.4356 | -96.42694444 | 34.84024269 | 262430176 | SRS10484450 |
| J474.C  | IFAA  | 8x | 34.781  | -91.49636667 | 35.62831164 | 268366216 | SRS10484451 |
| J533.C  | IGSC  | 8x | 43.6103 | -75.33416667 | 17.87311575 | 134627217 | SRS10484452 |
| J560.B  | IGSE  | 8x | 41.3069 | -79.24388889 | 20.30599275 | 152952587 | SRS10484453 |
| J346.B  | IHXD  | 8x | 41.3678 | -82.6906167  | 31.36805791 | 236276338 | SRS10484454 |
| J030.B  | IHYD  | 8x | 38.4806 | -102.781863  | 35.54343283 | 267726876 | SRS10484455 |
| J544.A  | IHYP  | 8x | 43.315  | -78.71527778 | 32.71618707 | 246430968 | SRS10484456 |
| J021.A  | IHYU  | 8x | 29.4439 | -96.941093   | 35.26561332 | 265634232 | SRS10484457 |
| J549.C  | I1AC  | 8x | 42.8981 | -73.60027778 | 35.44450204 | 266981691 | SRS10484458 |
| J346.C  | I1AI  | 8x | 41.3678 | -82.6906167  | 37.64334736 | 283544244 | SRS10484459 |
| J347.A  | I1AQ  | 8x | 41.3678 | -82.6906167  | 36.04832991 | 271529956 | SRS10484460 |
| J347.B  | I1AY  | 8x | 41.3678 | -82.6906167  | 37.36786761 | 281469224 | SRS10484461 |
| J009.A  | I1BE  | 8x | 36.6004 | -103.609128  | 35.45878967 | 267089311 | SRS10484462 |
| J347.C  | I1BF  | 8x | 41.3678 | -82.6906167  | 37.81647417 | 284848302 | SRS10484463 |
| J436.B  | I1BG  | 8x | 39.41   | -79.66       | 37.31217371 | 281049716 | SRS10484464 |
| J474.B  | I1BH  | 8x | 34.781  | -91.49636667 | 38.38321088 | 289117182 | SRS10484465 |
| J533.B  | I1BI  | 8x | 43.6103 | -75.33416667 | 36.88452837 | 277828526 | SRS10484466 |
| J557.B  | I1BJ  | 8x | 41.3256 | -77.63638889 | 36.09043662 | 271847120 | SRS10484467 |
| J009.B  | I1BL  | 8x | 36.6004 | -103.609128  | 37.02334108 | 278874117 | SRS10484468 |
| J485.B  | I1BP  | 8x | 34.078  | -93.91188333 | 38.17240505 | 287529311 | SRS10484469 |
| J557.C  | I1BR  | 8x | 41.3256 | -77.63638889 | 36.08557004 | 271810463 | SRS10484470 |
| J575.A  | I1BS  | 8x | 40.8766 | -77.836728   | 37.37902065 | 281553233 | SRS10484471 |
| J021.B  | I1BT  | 8x | 29.4439 | -96.941093   | 38.55393061 | 290403109 | SRS10484472 |
| J544.B  | I1BY  | 8x | 43.315  | -78.71527778 | 36.13144474 | 272156009 | SRS10484473 |
| J559.A  | I1BZ  | 8x | 40.6586 | -76.91833333 | 35.55791138 | 267835934 | SRS10484474 |
| J575.B  | I1CA  | 8x | 40.8766 | -77.836728   | 37.60769651 | 283275708 | SRS10484475 |
| J546.A  | I1CF  | 8x | 43.2683 | -78.35555556 | 36.17756757 | 272503424 | SRS10484476 |
| J560.A  | I1CG  | 8x | 41.3069 | -79.24388889 | 37.12882372 | 279668653 | SRS10484477 |
| J575.C  | I1CH  | 8x | 40.8766 | -77.836728   | 37.96218416 | 285945846 | SRS10484478 |
| J398.A  | I1CJ  | 8x | 44.53   | -95.08       | 36.26594262 | 273169099 | SRS10484479 |
| J560.C  | I1CN  | 8x | 41.3069 | -79.24388889 | 37.85904593 | 285168969 | SRS10484480 |
| J579.A  | I1CP  | 8x | 32.9119 | -84.16072222 | 37.98573818 | 286123264 | SRS10484481 |
| J028.A  | I1CQ  | 8x | 35.5928 | -93.824824   | 37.65310045 | 283617708 | SRS10484482 |
| J561.A  | I1CW  | 8x | 41.2764 | -77.94888889 | 37.21976846 | 280353684 | SRS10484483 |
| J579.C  | I1CX  | 8x | 32.9119 | -84.16072222 | 38.38723802 | 289147516 | SRS10484484 |
| J028.B  | I1CY  | 8x | 35.5928 | -93.824824   | 38.77568264 | 292073431 | SRS10484485 |
| J520.C  | I1DB  | 8x | 35.619  | -99.634082   | 36.36788043 | 273936934 | SRS10484486 |
| J581.A  | I1DE  | 8x | 42.0596 | -87.8422222  | 7.636216688 | 57518936  | SRS10484487 |



|        |      |    |         |              |             |           |             |
|--------|------|----|---------|--------------|-------------|-----------|-------------|
| J398.B | IJUS | 8x | 44.53   | -95.08       | 24.75431875 | 186459098 | SRS10484488 |
| J511.C | IILL | 8x | 40.4792 | -94.0791528  | 35.87409311 | 270217537 | SRS10484489 |
| J528.A | IIMC | 8x | 43.1475 | -75.28138889 | 32.81793796 | 247197395 | SRS10484491 |
| J559.B | IIML | 8x | 40.6586 | -76.91833333 | 36.05323447 | 271566899 | SRS10484490 |
| J581.B | IJAX | 8x | 42.0596 | -87.8422222  | 34.10226357 | 256871432 | SRS10461477 |
| J628.B | INGC | 8x | 42.6729 | -72.46135    | 36.39888202 | 274170450 | SRS10461476 |
| J227.A | IRUE | 8x | 40.72   | -96.12       | 37.20018264 | 280206156 | SRS10461477 |
| J579.B | IRUX | 8x | 32.9119 | -84.16072222 | 37.88909152 | 285395284 | SRS10461478 |
| J659.A | IRWY | 8x | 33.3211 | -97.581455   | 34.13902509 | 257148334 | SRS10461479 |
| J659.B | IRWZ | 8x | 33.3211 | -97.581455   | 38.64575197 | 291094743 | SRS10461480 |
| J346.A | ITAQ | 8x | 41.3678 | -82.6906167  | 32.24988652 | 242918612 | SRS10461481 |
| J436.A | ITAS | 8x | 39.41   | -79.66       | 26.58522398 | 200250184 | SRS10461482 |
| J462.A | ITAT | 8x | 30.4813 | -92.66762    | 32.69988785 | 246308196 | SRS10461483 |
| J474.A | ITAW | 8x | 34.781  | -91.49636667 | 14.82119392 | 111638962 | SRS10461484 |
| J529.A | ITAX | 8x | 41.4283 | -74.79694444 | 13.5936223  | 102392418 | SRS10461485 |
| J529.B | ITAY | 8x | 41.4283 | -74.79694444 | 22.98993506 | 173169078 | SRS10461486 |
| J549.A | ITBA | 8x | 42.8981 | -73.60027778 | 36.84825939 | 277555334 | SRS10461487 |
| J549.B | ITBB | 8x | 42.8981 | -73.60027778 | 25.47557488 | 191891878 | SRS10461488 |
| J554.A | ITBC | 8x | 41.4578 | -75.8525     | 26.4488364  | 199222860 | SRS10461489 |
| J554.C | ITBD | 8x | 41.4578 | -75.8525     | 15.04920771 | 113356450 | SRS10461490 |
| J557.A | ITBE | 8x | 41.3256 | -77.63638889 | 26.33673594 | 198378476 | SRS10461491 |
| J561.B | ITBF | 8x | 41.2764 | -77.94888889 | 36.25664795 | 273099088 | SRS10461492 |
| J563.A | ITBG | 8x | 42.1714 | -80.07305556 | 36.50164919 | 274944532 | SRS10461493 |
| J568.A | ITBH | 8x | 40.0847 | -79.71166667 | 32.67062621 | 246087786 | SRS10461494 |
| J570.B | ITBI | 8x | 41.3331 | -77.65178    | 24.46597401 | 184287174 | SRS10461495 |
| J002.A | JBDA | 6x | 28.75   | -82.53       | 55.88094401 | 420916872 | SRS10461496 |
| J069.A | JBDS | 8x | 27.18   | -82.49       | 26.0656062  | 196336222 | SRS10461497 |
| J072.A | JBDT | 8x | 28.36   | -82.21       | 25.38342666 | 191197782 | SRS10461498 |
| J072.B | JBDU | 8x | 28.36   | -82.21       | 28.44578091 | 214264618 | SRS10461499 |
| J083.A | JBDW | 8x | 32.91   | -84.33       | 50.88047123 | 383251378 | SRS10461500 |
| J166.A | JBDY | 8x | 26.9794 | -82.26388889 | 32.49922104 | 244796696 | SRS10461501 |
| J178.A | JBDZ | 8x | 29.5358 | -81.88472222 | 31.72769372 | 238985254 | SRS10461502 |
| J179.A | JBEA | 8x | 29.5233 | -81.92888889 | 38.75540872 | 291920720 | SRS10461503 |
| J187.A | JBEB | 8x | 30.0536 | -84.38833333 | 30.09327947 | 226674214 | SRS10461504 |
| J195.A | JBEC | 8x | 35.4487 | -76.38083333 | 34.65140506 | 261007778 | SRS10461505 |
| J198.A | JBED | 8x | 33.3114 | -83.46036667 | 31.54176699 | 237584782 | SRS10461506 |
| J200.A | JBEE | 8x | 32.0282 | -83.66005    | 34.32109196 | 258519732 | SRS10461507 |
| J213.A | JBEF | 8x | 26.94   | -97.9872     | 22.30731396 | 168027312 | SRS10461508 |
| J214.A | JBEG | 8x | 33.14   | -96.11       | 23.42804322 | 176469078 | SRS10461509 |
| J221.A | JBEH | 8x | 27.12   | -97.9575     | 37.40709528 | 281764702 | SRS10461510 |
| J265.A | JBEI | 8x | 44.9971 | -92.7807     | 32.3888924  | 243965658 | SRS10461511 |
| J282.A | JBEJ | 8x | 37.4674 | -88.91667    | 37.07649834 | 279274518 | SRS10461512 |
| J304.A | JBEP | 8x | 26.8697 | -97.698227   | 34.4342067  | 259371756 | SRS10461513 |
| J309.A | JBEQ | 8x | 27.9545 | -97.771942   | 42.00870324 | 316425792 | SRS10461514 |
| J328.A | JBER | 8x | 28.6541 | -96.681313   | 31.09621312 | 234228698 | SRS10461515 |
| J342.C | JBES | 8x | 35.4526 | -86.023636   | 23.28594058 | 175398706 | SRS10461516 |
| J363.C | JBET | 8x | 40.4356 | -96.42694444 | 28.42806913 | 214131206 | SRS10461517 |
| J369.A | JBEU | 8x | 42.8164 | -84.3400083  | 30.3428272  | 228553904 | SRS10461518 |
| J397.A | JBEY | 8x | 46.2    | -94.42       | 38.64009573 | 291052138 | SRS10461519 |
| J402.B | JBEZ | 8x | 40.55   | -80.67       | 24.69101398 | 185982262 | SRS10461520 |
| J417.A | JBFD | 8x | 38.48   | -78.52       | 21.09308052 | 234205102 | SRS10461521 |
| J417.B | JBFE | 8x | 38.48   | -78.52       | 20.69388057 | 155874308 | SRS10461522 |
| J447.B | JBFM | 8x | 43.44   | -92.38       | 28.06314494 | 211382456 | SRS10461523 |
| J451.A | JBFN | 8x | 41.58   | -83.67       | 32.22555001 | 242735300 | SRS10461524 |
| J462.B | JBFQ | 8x | 30.4813 | -92.66762    | 40.85207461 | 307713618 | SRS10461525 |
| J462.C | JBFR | 8x | 30.4813 | -92.66762    | 22.23016311 | 167446182 | SRS10461526 |
| J467.A | JBFS | 8x | 34.7468 | -91.75225    | 20.61808547 | 155303390 | SRS10461527 |
| J467.B | JBFT | 8x | 34.7468 | -91.75225    | 41.47858149 | 312432710 | SRS10461528 |
| J467.C | JBFU | 8x | 34.7468 | -91.75225    | 22.13991841 | 166766424 | SRS10461529 |
| J468.A | JBFW | 8x | 34.278  | -88.74181    | 31.45608366 | 236939382 | SRS10461530 |
| J468.B | JBFX | 8x | 34.278  | -88.74181    | 51.69105708 | 389357024 | SRS10461531 |
| J468.C | JBFY | 8x | 34.278  | -88.74181    | 41.58673419 | 313247358 | SRS10461532 |
| J475.B | JBFZ | 8x | 34.6266 | -91.58036111 | 12.42603299 | 93597684  | SRS10461533 |
| J476.B | JBGA | 8x | 34.7818 | -91.69780556 | 27.79078346 | 209330924 | SRS10461534 |
| J476.C | JBGB | 8x | 34.7818 | -91.69780556 | 31.64118595 | 238333644 | SRS10461535 |
| J478.A | JBGC | 8x | 34.4508 | -91.57307222 | 37.98853517 | 286144332 | SRS10461536 |
| J479.B | JBGD | 8x | 33.8636 | -92.252      | 37.21851441 | 280344238 | SRS10461537 |
| J486.A | JBGE | 8x | 35.3593 | -93.99823889 | 38.03751513 | 286513268 | SRS10461538 |
| J494.A | JBGF | 8x | 41.1982 | -96.29945833 | 23.1059145  | 174042680 | SRS10461539 |
| J494.B | JBGH | 8x | 41.1982 | -96.29945833 | 28.69504374 | 216142162 | SRS10461540 |
| J494.C | JBGH | 8x | 41.1982 | -96.29945833 | 21.3746956  | 161002470 | SRS10461541 |
| J495.A | JBGI | 8x | 30.4994 | -92.4063611  | 27.60410212 | 207924768 | SRS10461542 |
| J495.B | JBGJ | 8x | 30.4994 | -92.4063611  | 33.3921776  | 251522790 | SRS10461543 |
| J495.C | JBGK | 8x | 30.4994 | -92.4063611  | 27.15767867 | 204562134 | SRS10461544 |
| J505.A | JBGL | 8x | 32.3254 | -90.1455556  | 35.05232872 | 264027690 | SRS10461545 |
| J505.B | JBGM | 8x | 32.3254 | -90.1455556  | 27.20919196 | 204950152 | SRS10461546 |
| J505.C | JBGN | 8x | 32.3254 | -90.1455556  | 30.9676937  | 233260640 | SRS10461547 |
| J506.B | JBGP | 8x | 32.3364 | -89.4390833  | 28.62912705 | 215645652 | SRS10461548 |
| J507.A | JBGQ | 8x | 34.2535 | -88.8964722  | 30.22925098 | 227698404 | SRS10461549 |
| J507.B | JBGR | 8x | 34.2535 | -88.8964722  | 36.82923354 | 277412024 | SRS10461550 |
| J507.C | JBGS | 8x | 34.2535 | -88.8964722  | 22.45041973 | 169105240 | SRS10461551 |
| J523.A | JBGW | 8x | 42.2547 | -72.62861111 | 27.49637876 | 207113354 | SRS10461552 |

|        |      |    |         |              |             |            |             |
|--------|------|----|---------|--------------|-------------|------------|-------------|
| J529.C | JBGX | 8x | 41.4283 | -74.79694444 | 26.47042345 | 199385462  | SRS10461553 |
| J531.A | JBGY | 8x | 43.6331 | -76.19583333 | 37.09689506 | 279428154  | SRS10461554 |
| J531.B | JBGZ | 8x | 43.6331 | -76.19583333 | 39.84999672 | 300165580  | SRS10461555 |
| J165.A | JBHU | 8x | 27.2825 | -82.26305556 | 41.23491316 | 310597306  | SRS10461556 |
| J184.A | JBHW | 8x | 29.4558 | -82.47416667 | 147.8847115 | 1113924814 | SRS10461557 |
| J197.A | JBHX | 8x | 32.9082 | -85.02316667 | 25.32187512 | 190734152  | SRS10461558 |
| J201.A | JBHY | 8x | 33.2429 | -83.43189    | 22.56106302 | 169938648  | SRS10461559 |
| J202.A | JBHZ | 8x | 33.3879 | -83.30887    | 30.73728784 | 231525134  | SRS10461560 |
| J236.A | JBIA | 8x | 27.12   | -97.9525     | 26.64011336 | 200663632  | SRS10461561 |
| J275.A | JBID | 4x | 29.3247 | -101.3645    | 23.91437885 | 180132346  | SRS10461562 |
| J344.B | JBIF | 4x | 41.3046 | -88.1723167  | 29.43677705 | 221729184  | SRS10461563 |
| J428.A | JBII | 4x | 40.72   | -73.58       | 40.43701944 | 304587262  | SRS10461564 |
| J466.D | JBII | 4x | 30.4435 | -90.41235    | 26.07669804 | 196419770  | SRS10461565 |
| J471.B | JBII | 4x | 36.2186 | -94.48219444 | 30.31329712 | 228331472  | SRS10461566 |
| J477.B | JBIL | 4x | 34.5866 | -92.25368333 | 40.06641445 | 301795722  | SRS10461567 |
| J497.C | JBIN | 4x | 29.1757 | -90.1293889  | 35.35624063 | 266316872  | SRS10461568 |
| J499.B | JBIP | 4x | 30.3481 | -90.0571944  | 51.09832675 | 384892350  | SRS10461569 |
| J501.B | JBII | 4x | 30.3871 | -89.4609167  | 34.13114711 | 257088994  | SRS10461570 |
| J502.B | JBIR | 4x | 30.3765 | -88.6338056  | 39.86103147 | 300248698  | SRS10461571 |
| J503.B | JBIS | 4x | 31.1383 | -89.2423056  | 40.23883125 | 303094432  | SRS10461572 |
| J503.C | JBIT | 4x | 31.1383 | -89.2423056  | 41.15966185 | 310030484  | SRS10461573 |
| J513.A | BIU  | 8x | 40.2538 | -93.8326917  | 29.26380531 | 220426294  | SRS10461574 |
| J534.B | BIW  | 4x | 40.5856 | -74.11888889 | 47.87610551 | 360621334  | SRS10461575 |
| J589.A | BIY  | 4x | 37.9075 | -75.35108333 | 43.67289213 | 328961106  | SRS10461576 |
| J590.A | BIY  | 4x | 37.4559 | -75.83288889 | 47.15110607 | 355160358  | SRS10461577 |
| J608.B | BJA  | 4x | NA      | NA           | 23.51916015 | 177155406  | SRS10461578 |
| J612.B | BJB  | 4x | 41.4558 | -71.453889   | 29.30087563 | 220705522  | SRS10461579 |
| J618.A | BJC  | 4x | 41.4003 | -71.584722   | 62.61071758 | 471608128  | SRS10461580 |
| J625.A | BJD  | 4x | 41.3364 | -72.03365    | 27.75256211 | 209043026  | SRS10461581 |
| J640.A | BJE  | 4x | 41.6789 | -70.774167   | 30.22996549 | 227703786  | SRS10461582 |
| J644.A | BJG  | 4x | 41.385  | -71.633056   | 27.78004423 | 209250032  | SRS10461583 |
| J647.A | BJH  | 4x | 41.4558 | -71.453889   | 47.9697494  | 361326696  | SRS10461584 |
| J661.C | BJK  | 4x | 37.8414 | -75.654336   | 32.17235545 | 242334618  | SRS10461585 |
| J682.C | BJL  | 4x | 40.1789 | -74.31703889 | 20.63048526 | 155396790  | SRS10461586 |
| J533.A | BJP  | 8x | 43.6103 | -75.33416667 | 24.05471206 | 181189390  | SRS10461587 |
| J546.C | BJU  | 8x | 43.2683 | -78.35555556 | 38.98280623 | 293633566  | SRS10461588 |
| J554.B | BJW  | 8x | 41.4578 | -75.8525     | 42.95425695 | 323548068  | SRS10461589 |
| J558.A | BJX  | 8x | 41.4986 | -75.89944444 | 38.88851792 | 292923350  | SRS10461590 |
| J563.B | BJY  | 8x | 42.1714 | -80.07305556 | 21.1918643  | 159625314  | SRS10461591 |
| J563.C | BJZ  | 8x | 42.1714 | -80.07305556 | 27.0858916  | 204021406  | SRS10461592 |
| J564.B | JBKA | 8x | 41.2731 | -79.84694444 | 31.23632383 | 235284066  | SRS10461593 |
| J565.A | JBKB | 8x | 39.7217 | -79.87805556 | 38.58020687 | 290601032  | SRS10461594 |
| J566.C | JBKC | 8x | 41.4622 | -79.64972222 | 51.00859503 | 384216456  | SRS10461595 |
| J567.B | JBKD | 8x | 39.8711 | -79.49361111 | 37.61191138 | 283307456  | SRS10461596 |
| J567.C | JBKE | 8x | 39.8711 | -79.49361111 | 29.42109782 | 221611082  | SRS10461597 |
| J568.B | JBKF | 8x | 40.0847 | -79.71166667 | 52.10675561 | 392488226  | SRS10461598 |
| J568.C | JBKG | 8x | 40.0847 | -79.71166667 | 32.61810474 | 245692174  | SRS10461599 |
| J570.A | JBKH | 8x | 41.3331 | -77.65178    | 48.37255454 | 364360780  | SRS10461600 |
| J572.A | JBKI | 8x | 41.6657 | -80.273924   | 34.29022604 | 258287238  | SRS10461601 |
| J572.B | JBKJ | 8x | 41.6657 | -80.273924   | 38.12745741 | 287190748  | SRS10461602 |
| J616.A | JBKL | 8x | 44.5884 | -70.3521     | 38.74262445 | 291824424  | SRS10461603 |

**Supplemental Table 1.** Full list of samples analyzed for this manuscript with identifying metadata information. Library (LIB) is the name of the sequencing library.

| Node                                                             | Estimated Age (kya):<br>Model 1 | 95% bottom: Model 1 | 95% top: Model 1 | Posterior support:<br>Model 1 | Estimated Age (kya):<br>Model 2 | 95% bottom: Model 2 | 95% top: Model 2 | Posterior support:<br>Model 2 | Estimated Age (kya):<br>Model 3 | 95% bottom: Model 3 | 95% top: Model 3 | Posterior support:<br>Model 3 |
|------------------------------------------------------------------|---------------------------------|---------------------|------------------|-------------------------------|---------------------------------|---------------------|------------------|-------------------------------|---------------------------------|---------------------|------------------|-------------------------------|
| <b>South</b>                                                     | 86.2                            | 34.4                | 138              | 1                             | 79.7                            | 34.1                | 134              | 1                             | 74.6                            | 32.3                | 126              | 1                             |
| <b>Midwest A</b>                                                 | 70.4                            | 30                  | 115              | 1                             | 67.5                            | 27.3                | 110              | 1                             | 63.6                            | 23.1                | 105              | 1                             |
| <b>Midwest B</b>                                                 | 64.8                            | 32                  | 101              | 1                             | 65.6                            | 31.9                | 105              | 1                             | 57.6                            | 22.1                | 95               | 1                             |
| <b>Gulf</b>                                                      | 86                              | 27.4                | 156              | 1                             | 83.2                            | 30.5                | 154              | 1                             | 78.3                            | 23.4                | 143              | 1                             |
| <b>Atlantic</b>                                                  | 82.1                            | 36                  | 138              | 1                             | 79.7                            | 30                  | 128              | 1                             | 75                              | 29.2                | 126              | 1                             |
| <b>[South, Midwest A]</b>                                        | 236                             | 142                 | 353              | 1                             | 228                             | 123                 | 330              | 1                             | 217                             | 126                 | 325              | 1                             |
| <b>[[South, Midwest A],<br/>Midwest B]</b>                       | 382                             | 249                 | 510              | 1                             | 371                             | 229                 | 520              | 1                             | 361                             | 231                 | 500              | 1                             |
| <b>[Gulf, Atlantic]</b>                                          | 292                             | 184                 | 420              | 1                             | 285                             | 167                 | 397              | 1                             | 277                             | 167                 | 401              | 1                             |
| <b>[[[South, Midwest A],<br/>Midwest B],[Gulf,<br/>Atlantic]</b> | 994                             | 698                 | 1,260            | 1                             | 966                             | 691                 | 1290             | 1                             | 960                             | 676                 | 1240             | 1                             |
| <b>South - 1</b>                                                 | 40.2                            | 11.9                | 76.8             | 1                             | 37.7                            | 12.4                | 71               | 1                             | 34.7                            | 10.5                | 65.1             | 1                             |
| <b>Midwest A - 1</b>                                             | 17.3                            | 1.7                 | 36.7             | 0.99                          | 16.7                            | 1.2                 | 36.2             | 1                             | 15                              | 1.3                 | 31.4             | 0.99                          |
| <b>Midwest B - 1</b>                                             | 4.5                             | 0                   | 13.8             | 1                             | 4.7                             | 0                   | 13.9             | 1                             | 3.7                             | 0                   | 11.4             | 1                             |
| <b>Midwest B - 2</b>                                             | 7.6                             | 0                   | 22.3             | 1                             | 7.5                             | 0                   | 21.7             | 1                             | 6.3                             | 1                   | 18.5             | 1                             |
| <b>Atlantic - 1</b>                                              | 6.6                             | 0                   | 19.2             | 1                             | 6.7                             | 0                   | 19.7             | 1                             | 5.5                             | 0                   | 17.4             | 1                             |
| <b>Atlantic - 2</b>                                              | 8.5                             | 0                   | 25               | 1                             | 7.5                             | 0                   | 23.5             | 1                             | 7.5                             | 0                   | 22.6             | 1                             |

**Supplemental Table 2.** Estimated divergence date estimates with confidence intervals from BEAST v2.6.6 for the three models. Node indicates the comparisons between defined switchgrass clade groupings (see Supplemental Table 4).

| LIB   |      |      |       |      |            |
|-------|------|------|-------|------|------------|
| JBHU  | JBKG | IJKD | IGPI  | IRXR | IGNW       |
| IIBE  | JBES | IIKE | JBEG  | IJBN | IGQH       |
| JBEB  | IICP | IICQ | INIB  | IEYW | IILU       |
| JBEH  | JBGE | JBEY | INHS  | IHXK | IRYE       |
| JBER  | IHWR | JBEU | IJAM  | IEPA | INGR       |
| IENU  | IEXR | JBGC | INIH  | IELR | IIBQ       |
| IELE  | JBIX | JBJP | IEMQ  | IEYH | INFC       |
| IEYA  | JBFR | JBGZ | INIK  | IEPC | IJBU       |
| INFP  | IGRP | JBGY | IEZB  | IRYZ | ITCS       |
| ITCH  | IIFE | JBKC | ININ  | IRXD | IEYE       |
| IELS  | JBGG | JBGP | IRXB  | IGPP | IEYD       |
| IGNP  | IGNN | JBEZ | IELY  | IEXP | IHXG       |
| INFM  | IIFT | IGQW | IEZA  | IIMI | IEYL       |
| IJBR  | IGRS | IEZZ | INHP  | JBHJ | IEYM       |
| JBIA  | JBFY | IFAD | IGSA  | IGRG | ITCC       |
| IGQU  | JBJU | IIFY | IEZF  | IFAC | IRWD       |
| ASHOA | IIML | ITAX | IHZD  | IJBE | IEYF       |
| INFZ  | JBXJ | IIFL | IEMU  | ITCD | IEXW       |
| INIM  | IEMJ | JBIF | INIG  | IRXL | ITCJ       |
| IGRE  | IFAB | IGRA | IILB  | IMJC | IRWI       |
| PZXW  | IIFS | JBHY | IGQC  | IRYI | IELP       |
| IEMP  | IGRT | JBGF | IGPQ  | IJBH | IRYA       |
| IENS  | IHYF | JBFN | IJKZ  | IRXI | AOSTU      |
| IIBH  | IFAJ | JBGN | IFAW  | ITBR | IEYG       |
| JBDW  | IEZI | IILG | IFAZ  | IJAN | IGNI       |
| JBDA  | IHYD | IEZH | IFAQ  | WZGC | IEPJ       |
| JBGK  | IGPU | IEYJ | IEME  | INFF | IENI       |
| IEMC  | IFAA | IEYI | IIBT  | IELU | IFBB       |
| IGSE  | IIDE | IFAT | IRUI  | IFBD | IGRI       |
| IEZP  | IFAI | IGPM | ITAU  | IAD  | ITCQ       |
| IENF  | IRWY | IIIQ | IEMY  | INEW | IGQP       |
| JBKD  | IIFR | IIDB | INFH  | ITBY | INFB       |
| JBGX  | IIFQ | IRUE | AOSWH | IJBQ | IILQ       |
| IEZT  | IENN | IEMZ | IGRZ  | IEPX | AOSUO      |
| IHXD  | IENG | JBWJ | IEPG  | IGRQ | IRWU       |
| IGSD  | IHXS | JBIF | ITCM  | IGRW | IRYH       |
|       |      |      | IRYT  | IEPI | PhalliiFIL |

**Supplemental Table 3.** List of libraries used to build the full chloroplast tree.

| Library ID | Ploidy | Genepool | Clade     | Subclade      |
|------------|--------|----------|-----------|---------------|
| ASHOA      | 8X     | Gulf     | Southern  | Southern - 1  |
| IGQU       | 4X     | Gulf     | Southern  | Southern - 1  |
| JBEP       | 8X     | Gulf     | Southern  | Southern - 1  |
| IEMK       | 4X     | Gulf     | Southern  | NA            |
| IENZ       | 4X     | Gulf     | Southern  | NA            |
| JBEH       | 8X     | Gulf     | Southern  | Southern - 1  |
| IIJX       | 4X     | Midwest  | Midwest A | Midwest A - 1 |
| IGSE       | 8X     | Midwest  | Midwest A | Midwest A - 1 |
| IENF       | 4X     | Midwest  | Midwest A | Midwest A - 1 |
| IIJM       | 4X     | Midwest  | Midwest A | NA            |
| JBKD       | 8X     | Midwest  | Midwest A | NA            |
| IIAQ       | 8X     | Midwest  | Midwest A | NA            |
| IIJT       | 4X     | Midwest  | Midwest B | Midwest B - 2 |
| IGRS       | 8X     | Midwest  | Midwest B | Midwest B - 2 |
| IIBZ       | 8X     | Midwest  | Midwest B | NA            |
| IIIN       | 4X     | Midwest  | Midwest B | NA            |
| IIBS       | 8X     | Midwest  | Midwest B | NA            |
| IGPJ       | 4X     | Midwest  | Midwest B | NA            |
| IIAY       | 8X     | Midwest  | Midwest B | Midwest B - 1 |
| IGRH       | 4X     | Midwest  | Midwest B | Midwest B - 1 |
| IEYR       | 4X     | Atlantic | Atlantic  | Atlantic - 1  |
| IEYM       | 8X     | Atlantic | Atlantic  | Atlantic - 1  |
| IEYE       | 4X     | Atlantic | Atlantic  | Atlantic - 2  |
| IEYD       | 8X     | Atlantic | Atlantic  | Atlantic - 2  |
| IIBT       | 8X     | Gulf     | Gulf      | NA            |
| IEME       | 4X     | Gulf     | Gulf      | NA            |

**Supplemental Table 4.** List of libraries used to estimate divergence dates in BEAST v2.6.6.
